# Supplementary material for: Bio-Guided Isolation of New Compounds from Baccharis spp. as Antifungal against Botrytis cinerea
Source: MDPI journal article supplement (doi:10.3390/metabo12121292), 2022-12-19
Supplement: s1 [file s1]

# Bio-guided isolation of new compounds from *Baccharis* spp. as antifungal against *Botrytis cinerea*.

Ana A. Pinto <sup>1,2</sup>, Antonio Ruano-González <sup>1,\*</sup>, Abdellah Ezzanad <sup>1</sup>, Cristina Pinedo-Rivilla <sup>1</sup>, Rosario Sánchez-Maestre <sup>1</sup> and Juan Manuel Amaro-Luis <sup>2</sup>

<sup>1</sup> Departamento de Química Orgánica, Facultad de Ciencias, Universidad de Cádiz, Campus Rio San Pedro, 11510 Puerto Real, Spain

<sup>2</sup> Laboratorio de Productos Naturales, Departamento de Química, Facultad de Ciencias, Universidad de Los Andes (ULA), Mérida C.P. 5101, Venezuela

\* Correspondence: antonio.ruano@uca.es

## Table of contents

|                                                                                                                                                           |    |
|-----------------------------------------------------------------------------------------------------------------------------------------------------------|----|
| Figure SI- 2: Scheme of the bio-guides isolated compounds from <i>Baccharis trinervis</i> .....                                                           | 2  |
| Figure SI- 3: Scheme of the bio-guided isolated compounds from <i>Baccharis Zumbadorensis</i> .....                                                       | 3  |
| Figure SI-6a: gHMBC spectrum of compound <b>7A</b> ; Correlation between H-1 (3.11) and C1 (130,3) in compound <b>7A</b> . ....                           | 6  |
| Figure SI-6b: gHMBC spectrum of compound <b>7A</b> ; Correlation between H2/H6 with C2/C6 and H3/H5 with C3/C5 in compounds <b>7A</b> and <b>7B</b> ..... | 6  |
| Figure SI- 7b: gHSQC correlations in <b>7A</b> and <b>7B</b> .....                                                                                        | 8  |
| Figure SI-13a: NOESY spectrum of compound <b>8</b> ; Correlation between H19 and H20.....                                                                 | 12 |
| Figure SI-18a: gHSQC correlations of compound <b>11</b> . ....                                                                                            | 16 |
| <b>SI- 19- Nevadensin (1)</b> . ....                                                                                                                      | 17 |
| <b>SI- 20- 4',7-Dimethoxyapigenin (2)</b> .....                                                                                                           | 18 |
| <b>SI-21- Genkwanin (3)</b> .....                                                                                                                         | 19 |
| <b>SI- 22- Cirsimaritin (4)</b> .....                                                                                                                     | 20 |
| <b>SI- 23- Salvigenin (5)</b> . ....                                                                                                                      | 21 |
| <b>SI- 24- Galangustin (6)</b> . ....                                                                                                                     | 22 |
| <b>SI- 25- 3<math>\beta</math>,15-Dihydroxylabdan-7-en-17-al (8)</b> . ....                                                                               | 23 |
| <b>SI- 26- 1,2-Dyhidrosenedigital-2-ona (10)</b> . ....                                                                                                   | 25 |
| <b>SI- 27- 13-nor-11,12-Dihydroxybisabol-2-enone (11)</b> . ....                                                                                          | 26 |
| <b>SI- 29- Plate bioassay. Compound 10</b> .....                                                                                                          | 28 |
| <b>SI- 30- Positive control. Microplate Bioassay (irgasan)</b> . ....                                                                                     | 29 |
| <b>SI- 31- Positive control. Plate Bioassay (irgasan)</b> .....                                                                                           | 30 |

**Isolation procedure:**

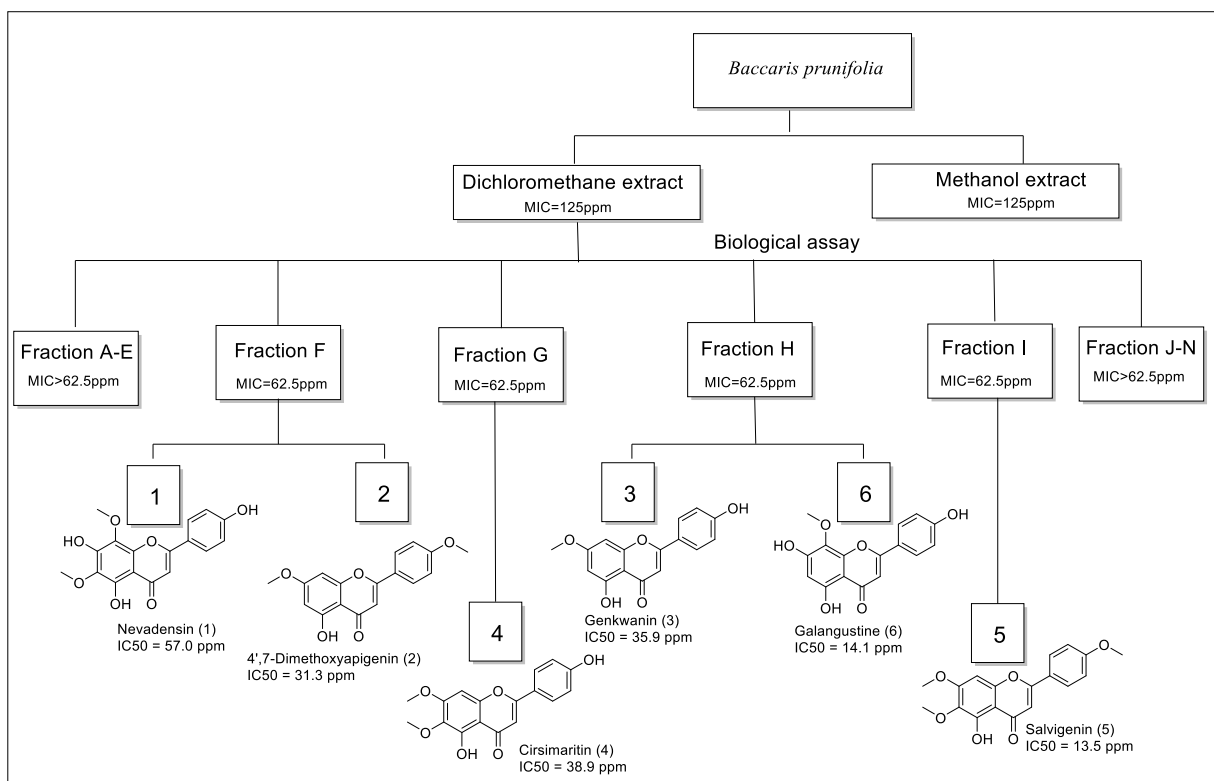

Figure SI- 1: Scheme of the bio-guided isolated compounds from *Baccharis prunifolia*.

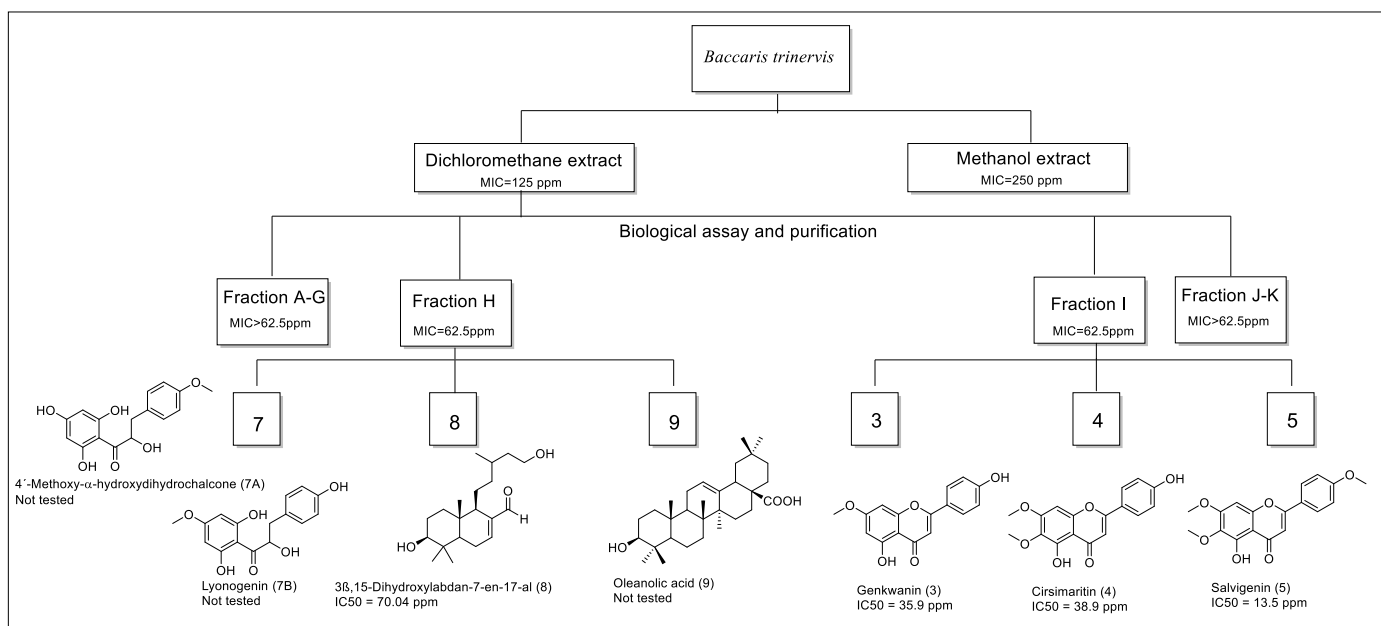

Figure SI- 2: Scheme of the bio-guides isolated compounds from *Baccharis trinervis*.

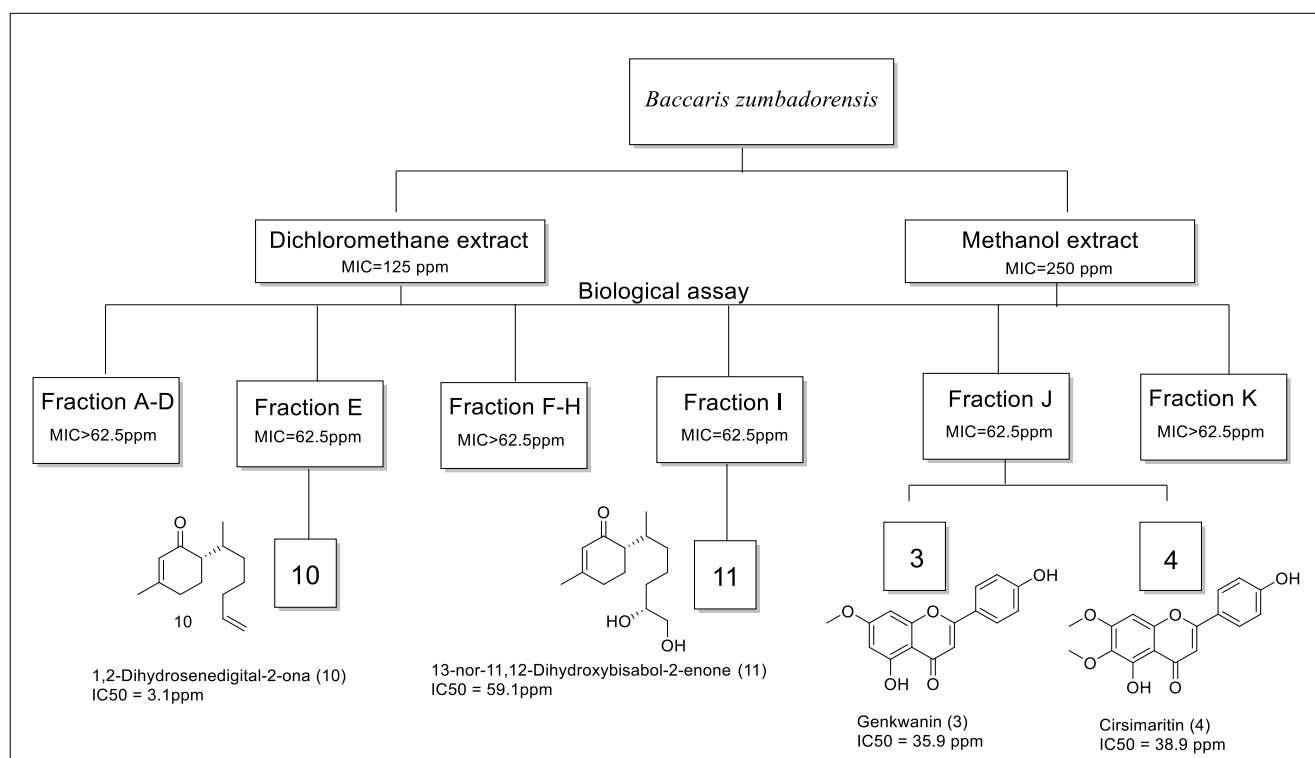

Figure SI- 3: Scheme of the bio-guided isolated compounds from *Baccharis Zumbadorensis*.

**1- NMR spectroscopic data**

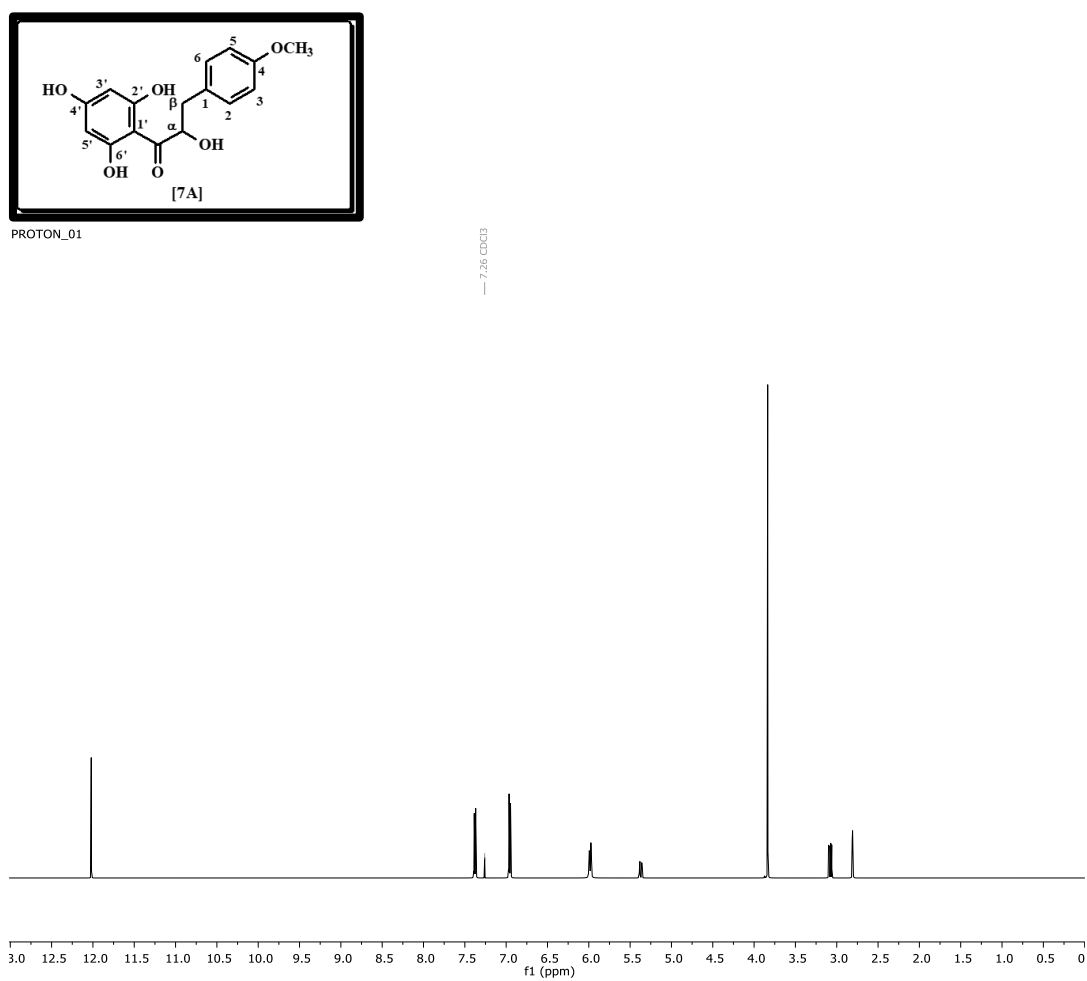

CARBON\_01

— 77.00 CDCl<sub>3</sub>

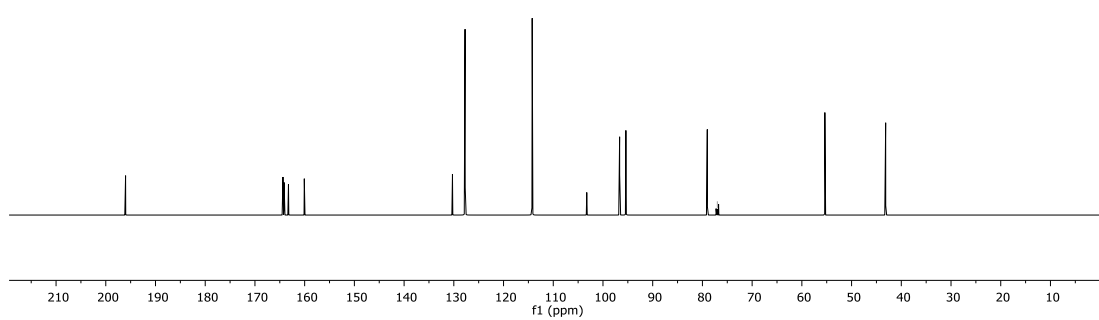

Figure SI- 5: <sup>13</sup>C-NMR spectrum of compound **7A** in CDCl<sub>3</sub> (100MHz).

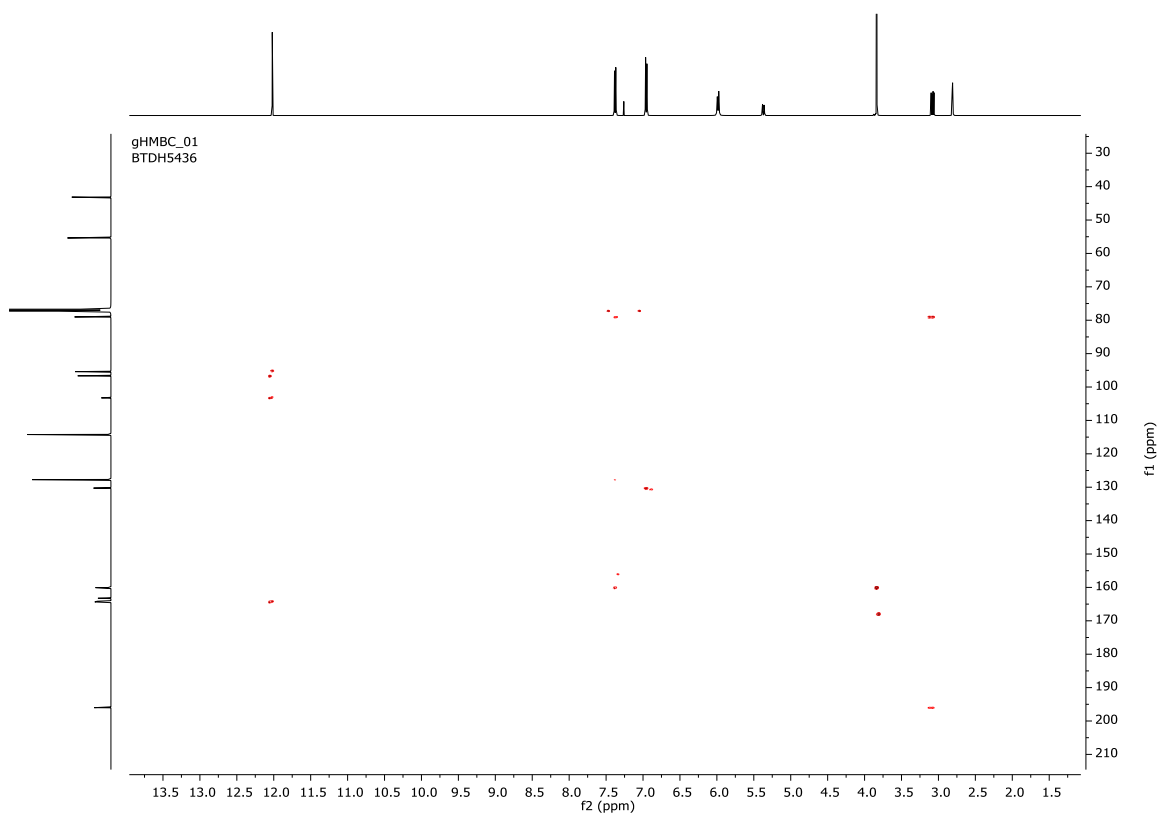

Figure SI- 6: gHMBC spectrum of compound **7A** in CDCl<sub>3</sub>.

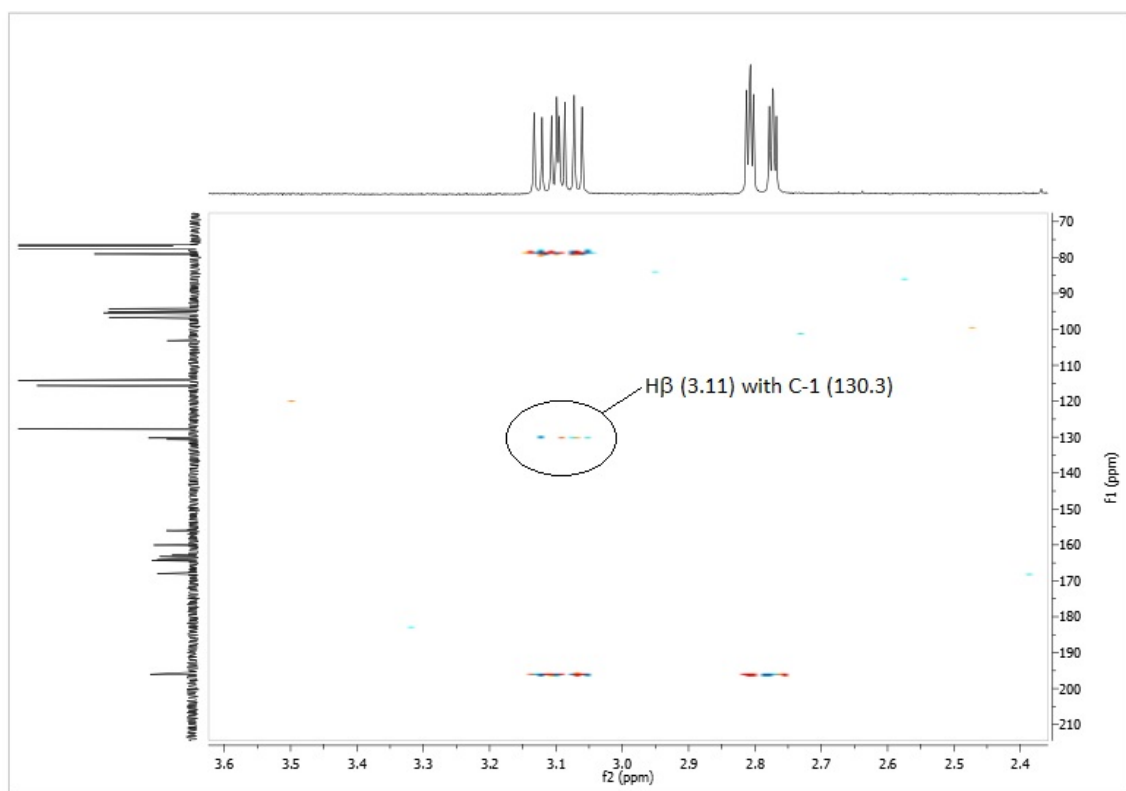

Figure SI-6a: gHMBC spectrum of compound **7A**; Correlation between H-1 (3.11) and C1 (130,3) in compound **7A**.

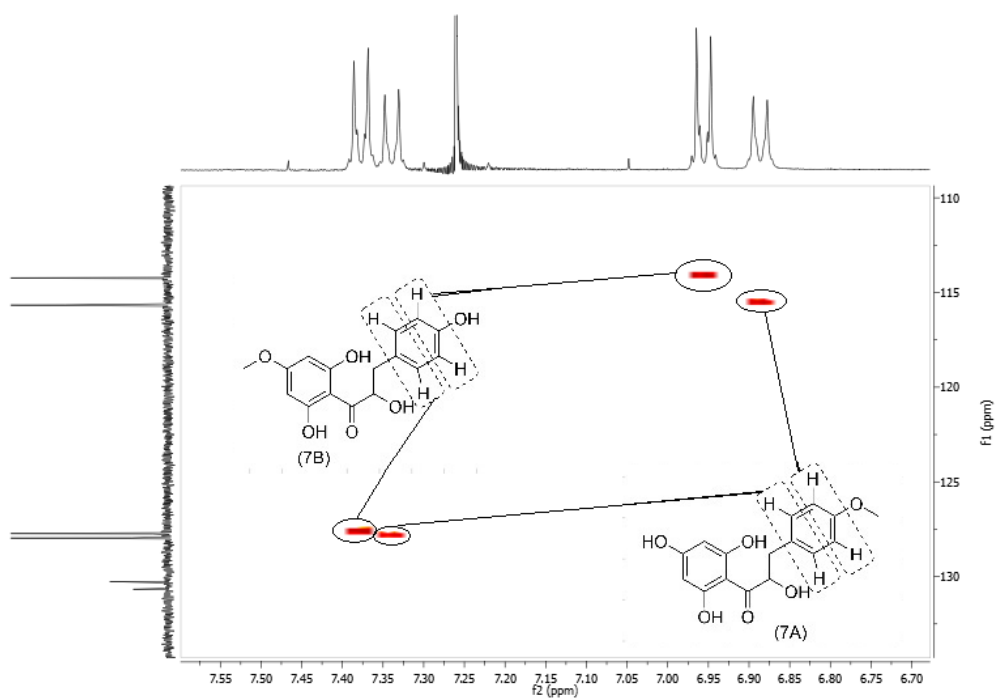

Figure SI-6b: gHMBC spectrum of compound **7A**; Correlation between H2/H6 with C2/C6 and H3/H5 with C3/C5 in compounds **7A** and **7B**.

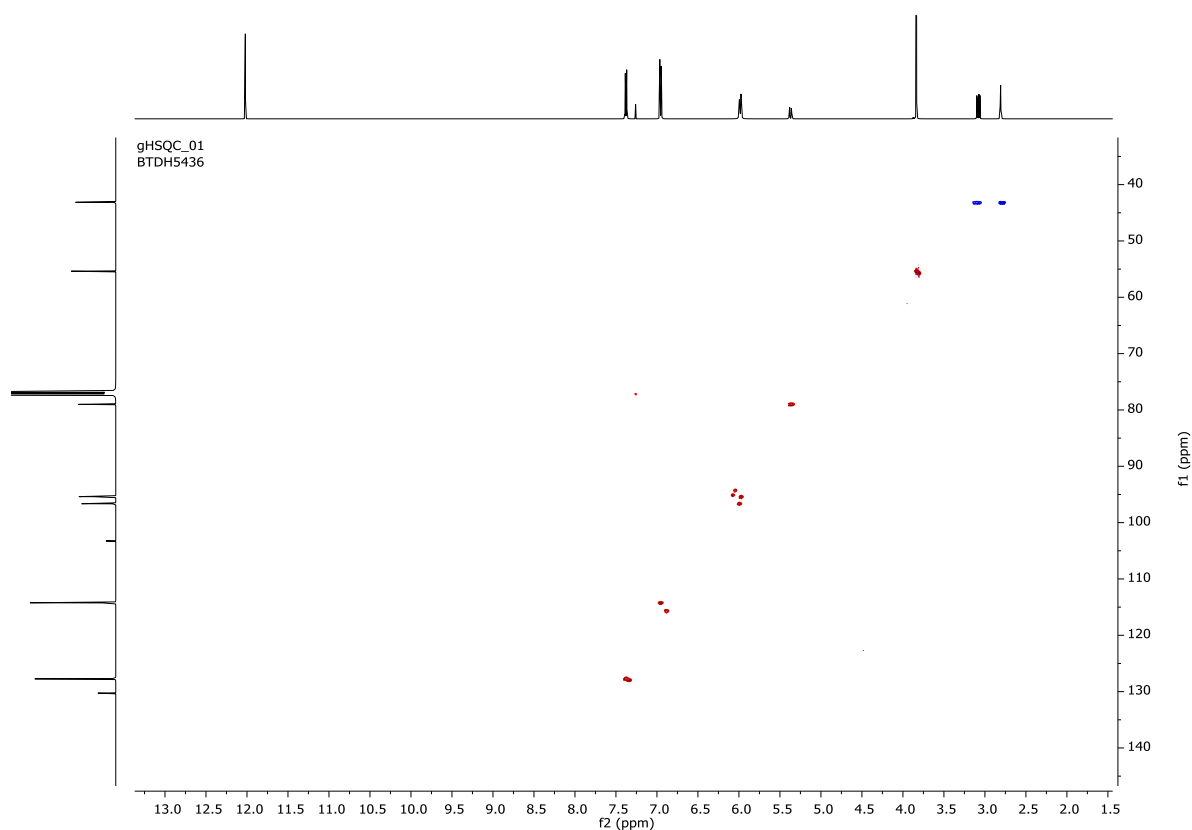

Figure SI- 7: gHSQC spectrum of compound **7A** in  $\text{CDCl}_3$ .

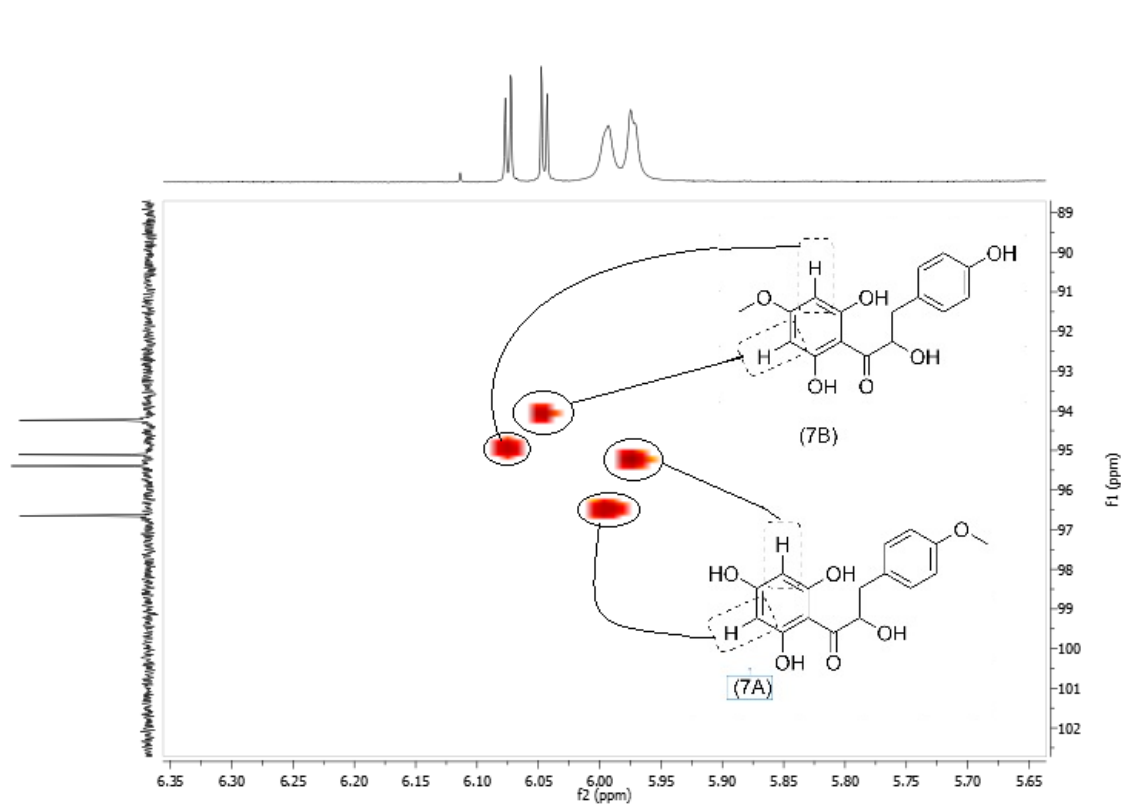

Figure SI- 7a: gHSQC spectrum of compound **7A**;HSQC correlations between H3'(5.99) with C3' (96.65) and H5'(5.98) with C5' (95.32) in compound **7A** and correlations between H3'(6.08) with C3' (95.09) and H5'(6.05) with C5' (94.19) in compound **7B**.

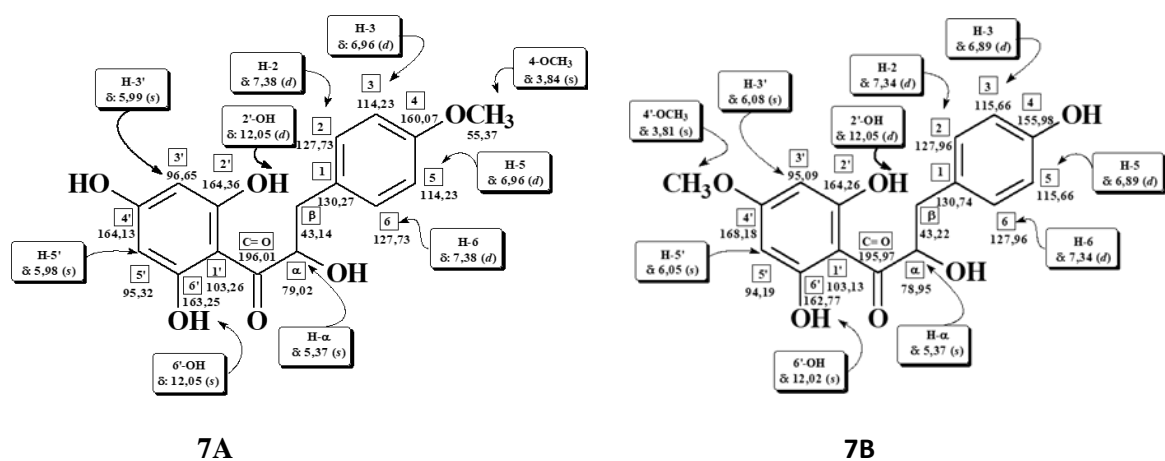

Figure SI- 7b: gHSQC correlations in **7A** and **7B**.

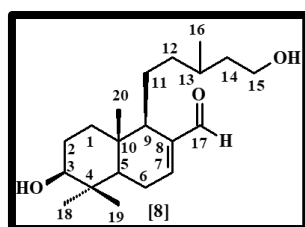

PROTON\_01  
Gradient Shimming

— 7.26 CDCl<sub>3</sub>

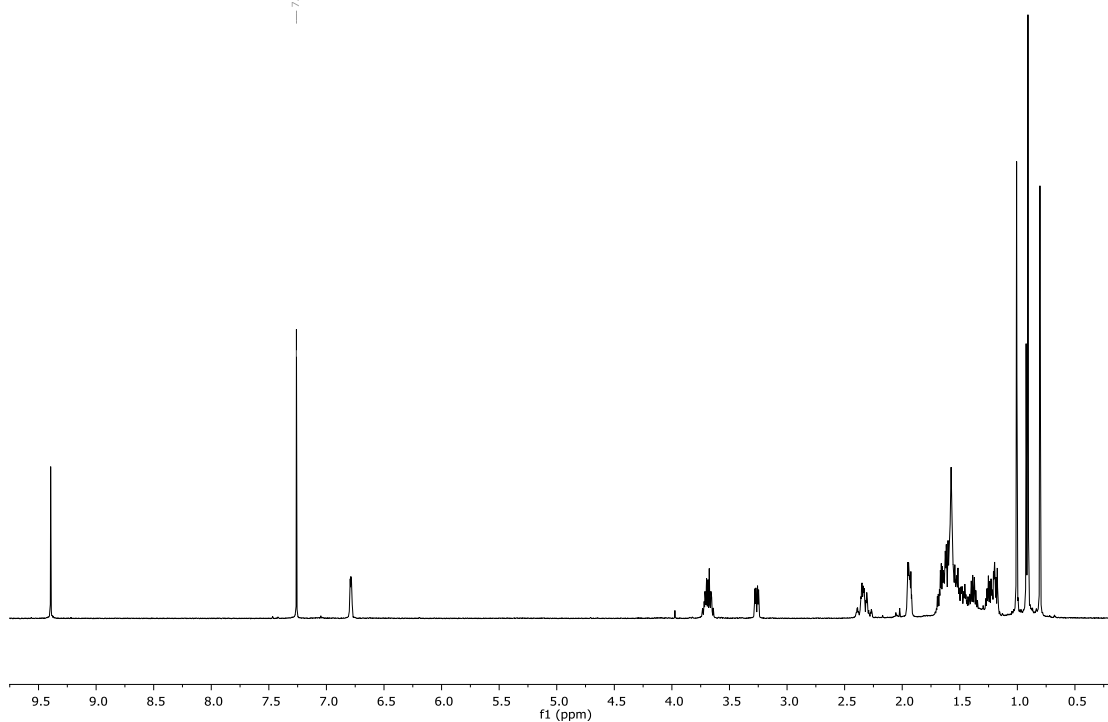

Figure SI- 8: <sup>1</sup>H-NMR spectrum of compound **8** in CDCl<sub>3</sub> (400MHz).



CARBON\_01  
Gradient Shimming

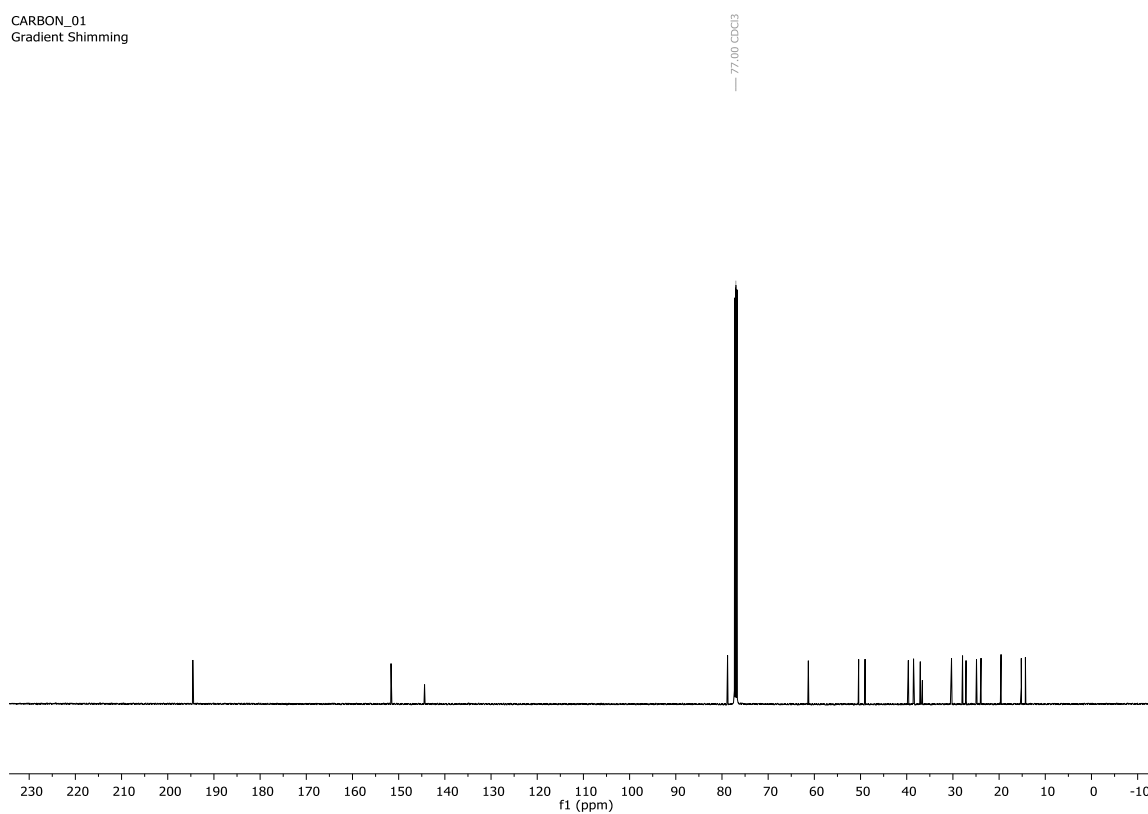

Figure SI- 9:  $^{13}\text{C}$ - NMR spectrum of compound **8** in  $\text{CDCl}_3$  (100MHz).

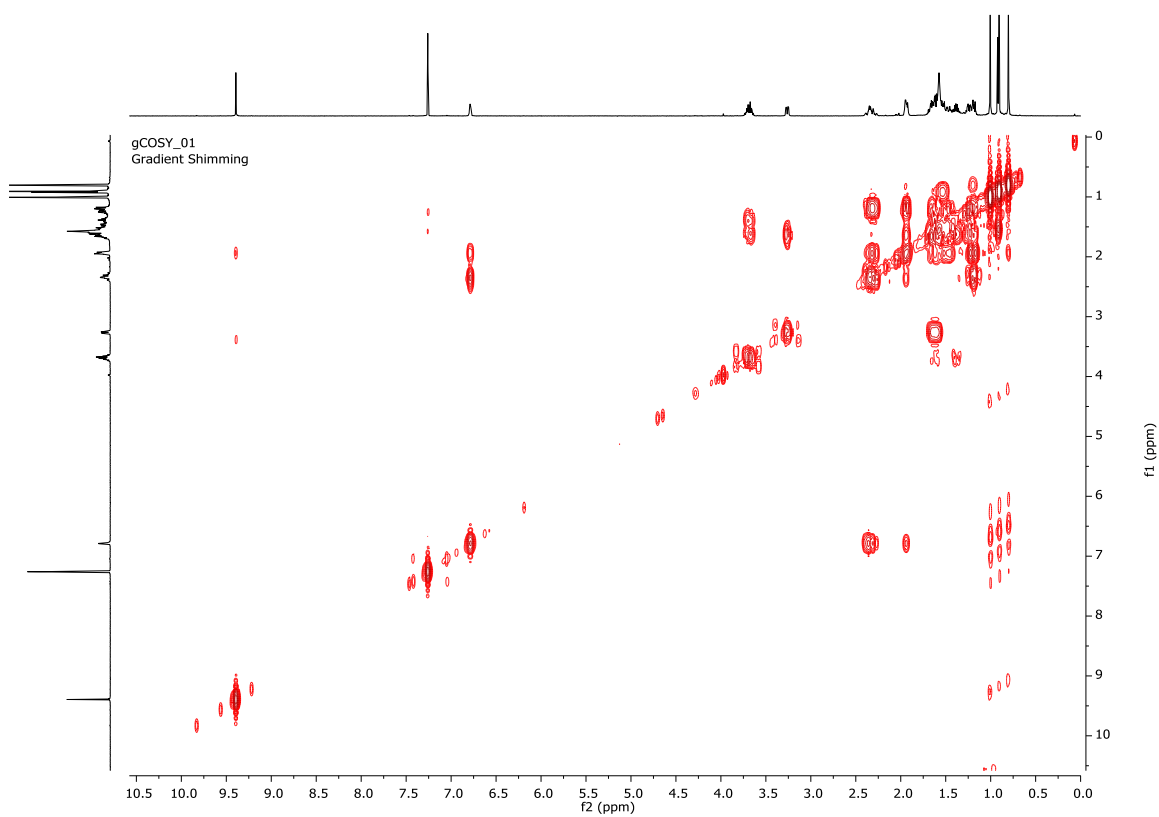

Figure SI-10: gCOSY spectrum of compound **8** in  $\text{CDCl}_3$  (400MHz).

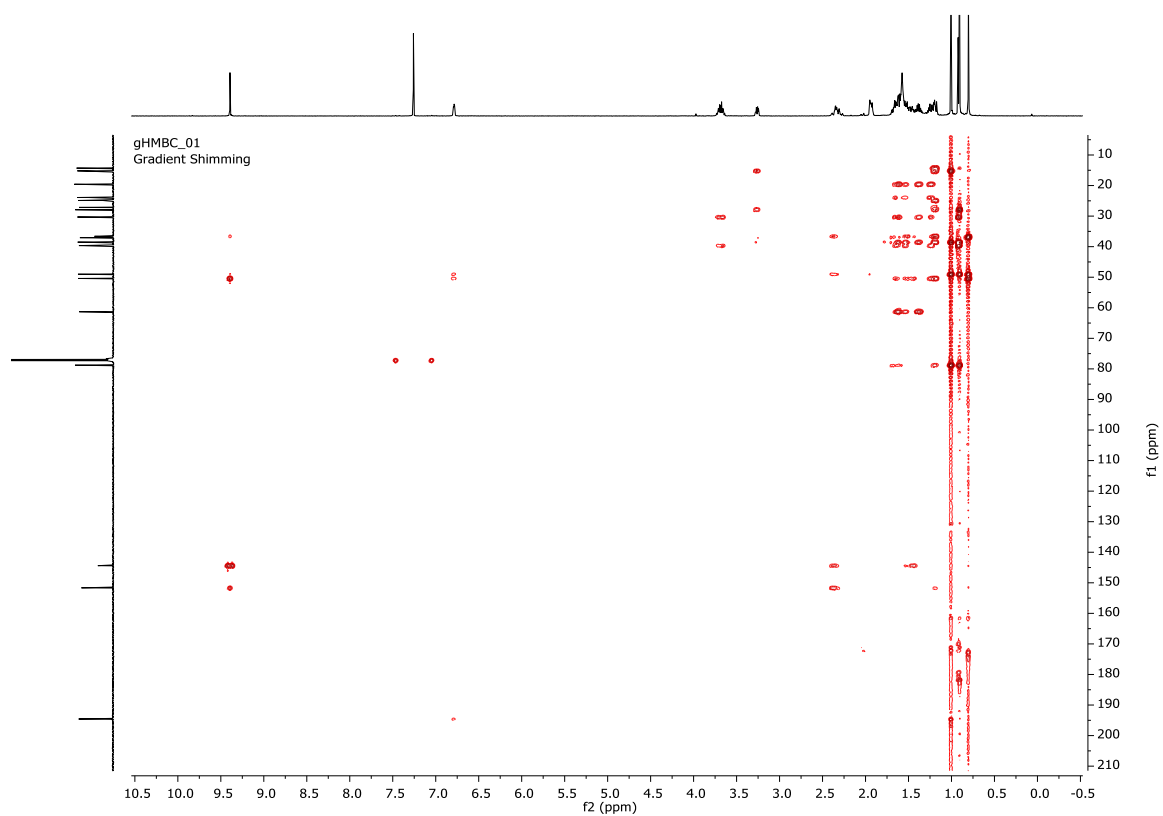

Figure SI-11: gHMBC spectrum of compound **8** in  $\text{CDCl}_3$ .

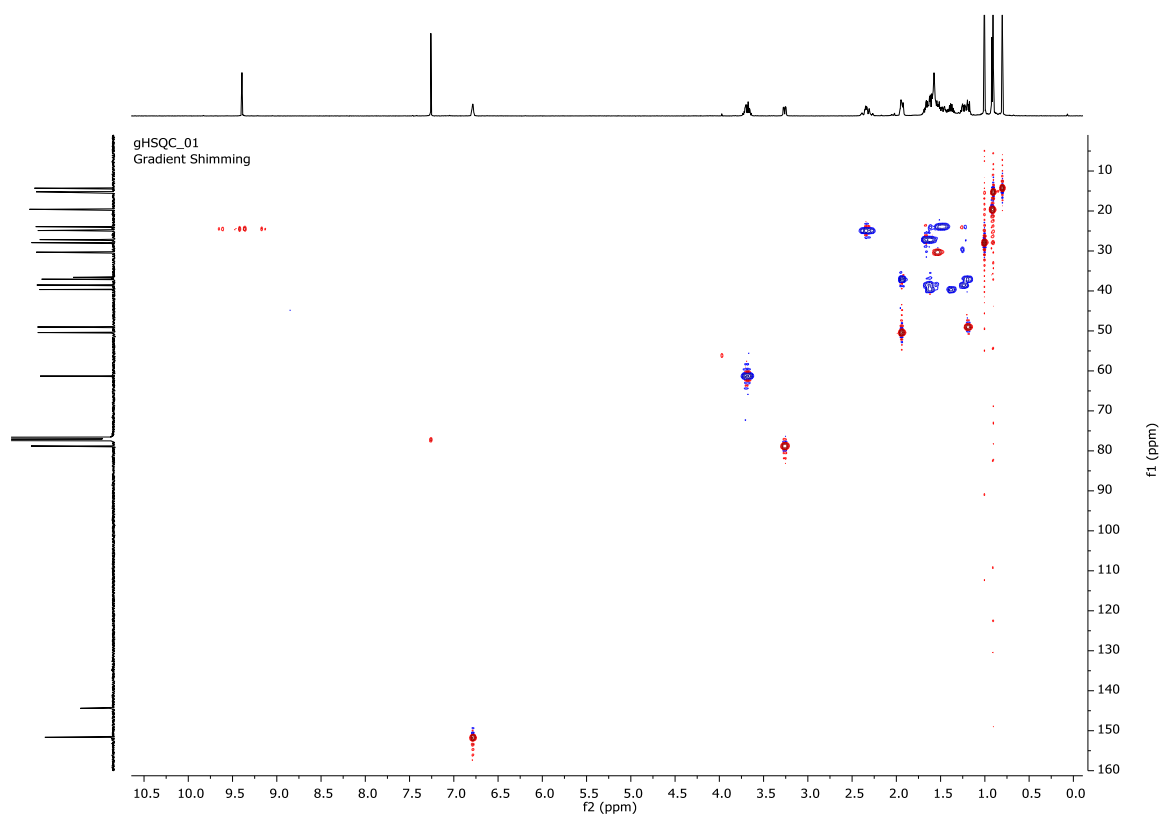

Figure SI-12: gHSQC spectrum of compound **8** in  $\text{CDCl}_3$ .

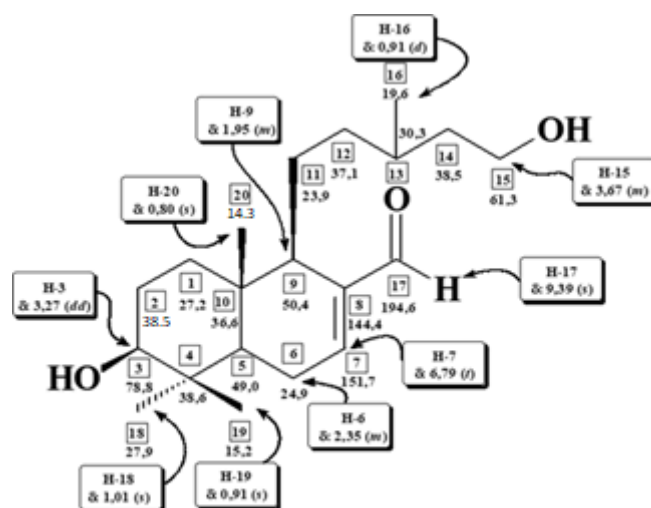

8

Figure SI- 12a: gHSQC correlations of compound **8**.

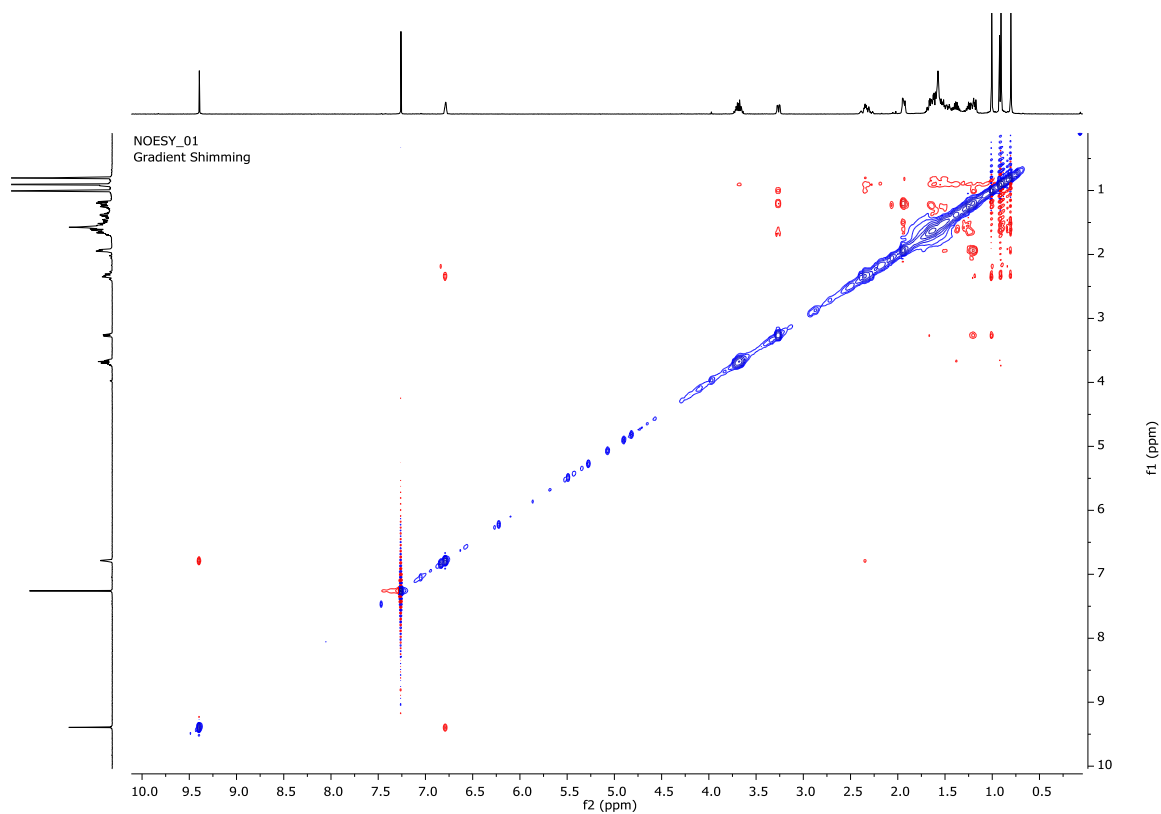

Figure SI-13: NOESY spectrum of compound **8** in CDCl<sub>3</sub>.

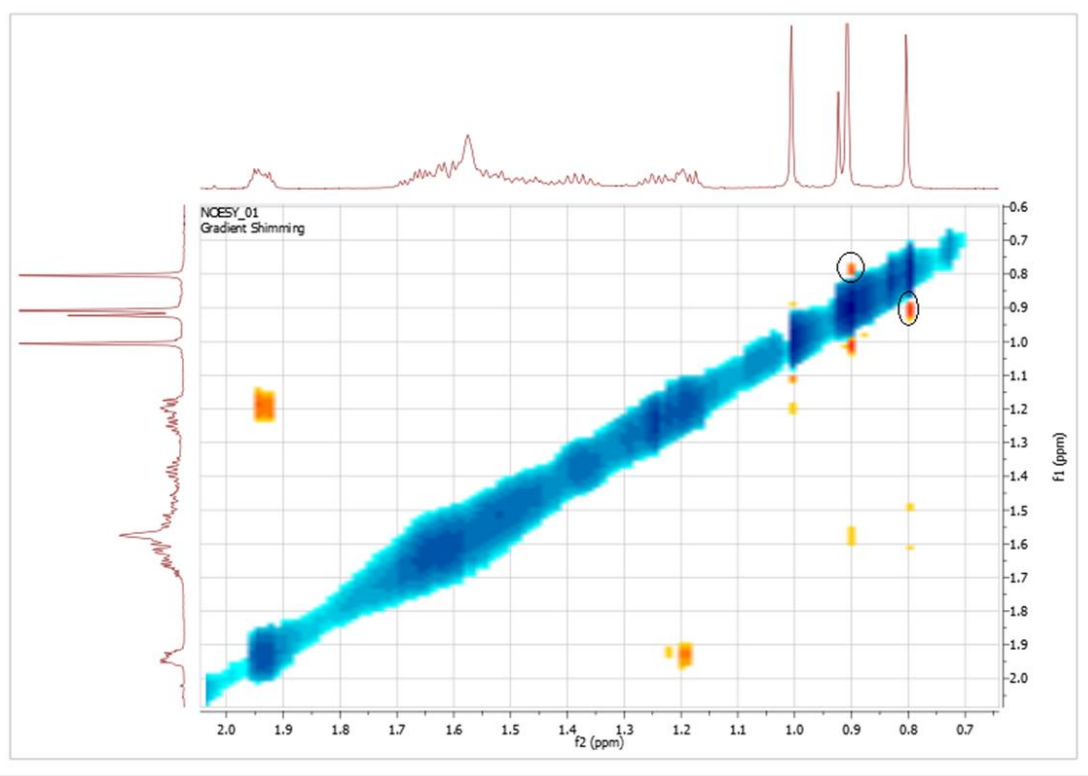

Figure SI-13a: NOESY spectrum of compound **8**; Correlation between H19 and H20.

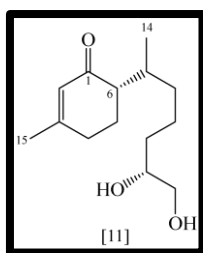

PROTON\_03  
Gradient Shimming

7.26

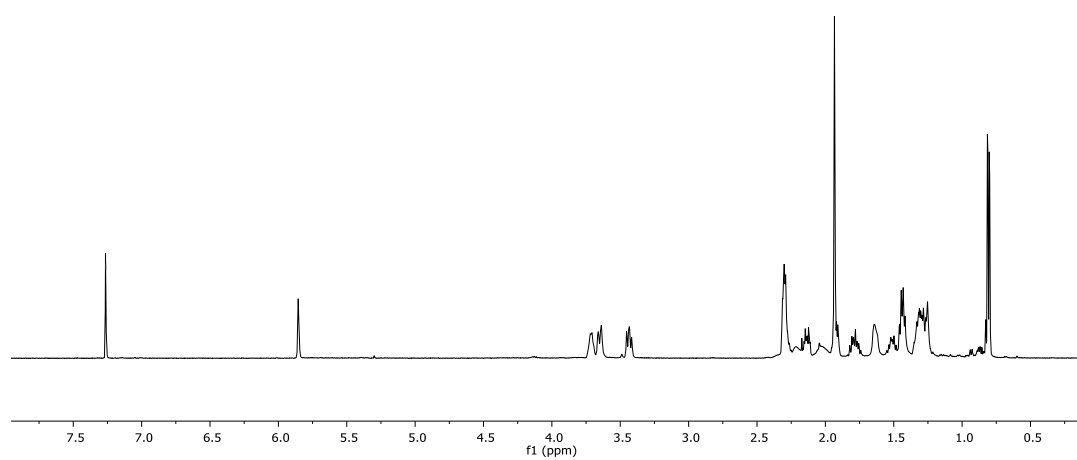

Figure SI-14:  $^1\text{H}$ -NMR spectrum of compound **11** in  $\text{CDCl}_3$  (400MHz).

CARBON\_01  
Gradient Shimming

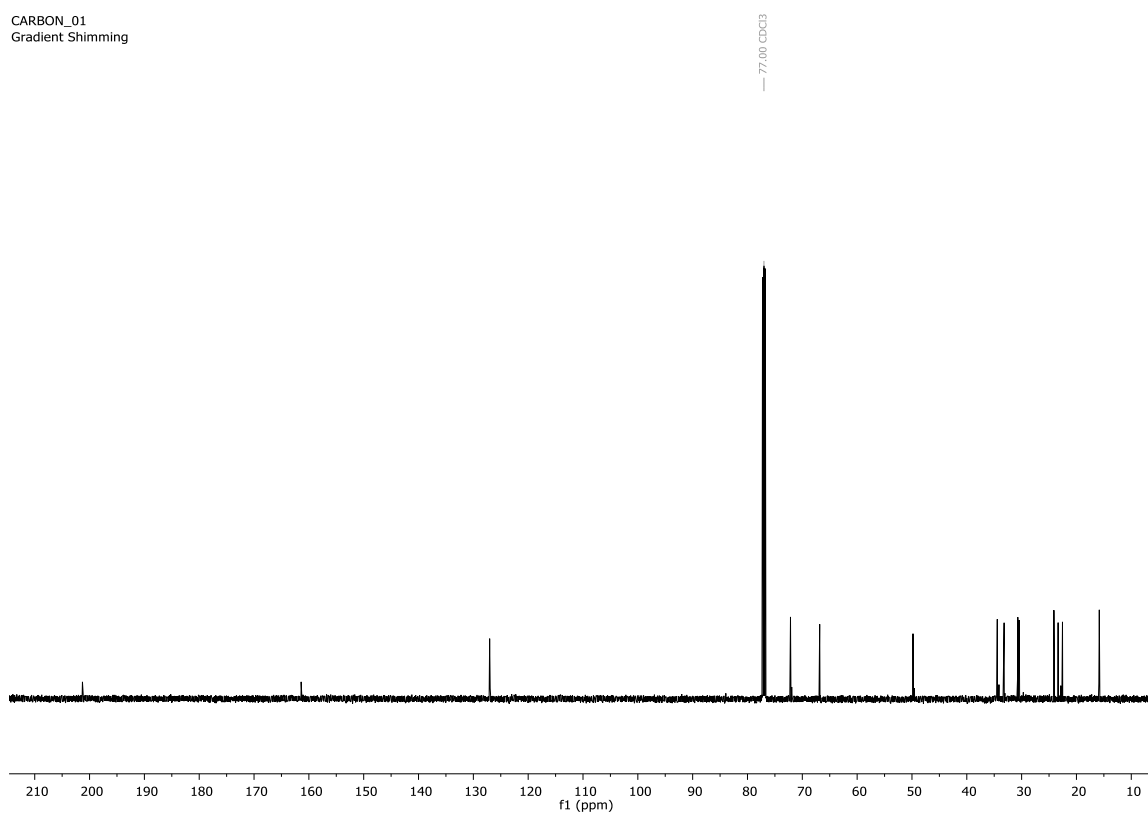

Figure SI-15:  $^{13}\text{C}$ - NMR spectrum of compound **11** in  $\text{CDCl}_3$  (100MHz).

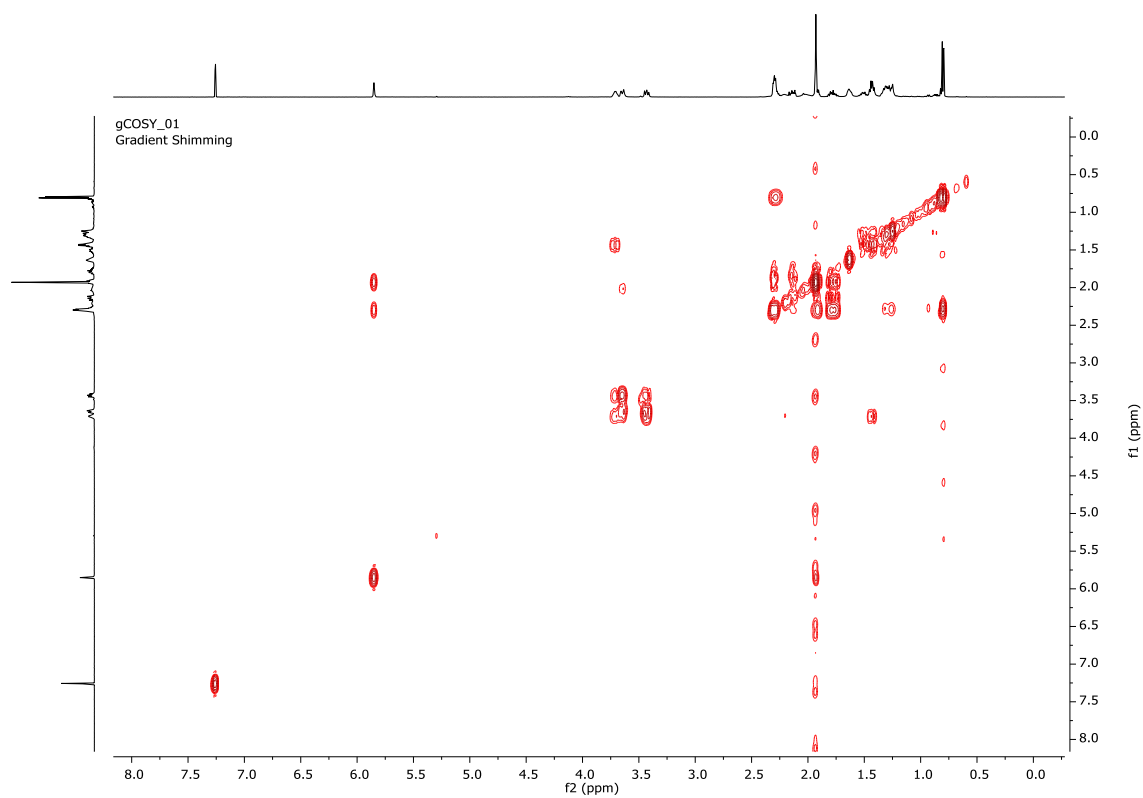

Figure SI-16: gCOSY spectrum of compound **11** in  $\text{CDCl}_3$ .

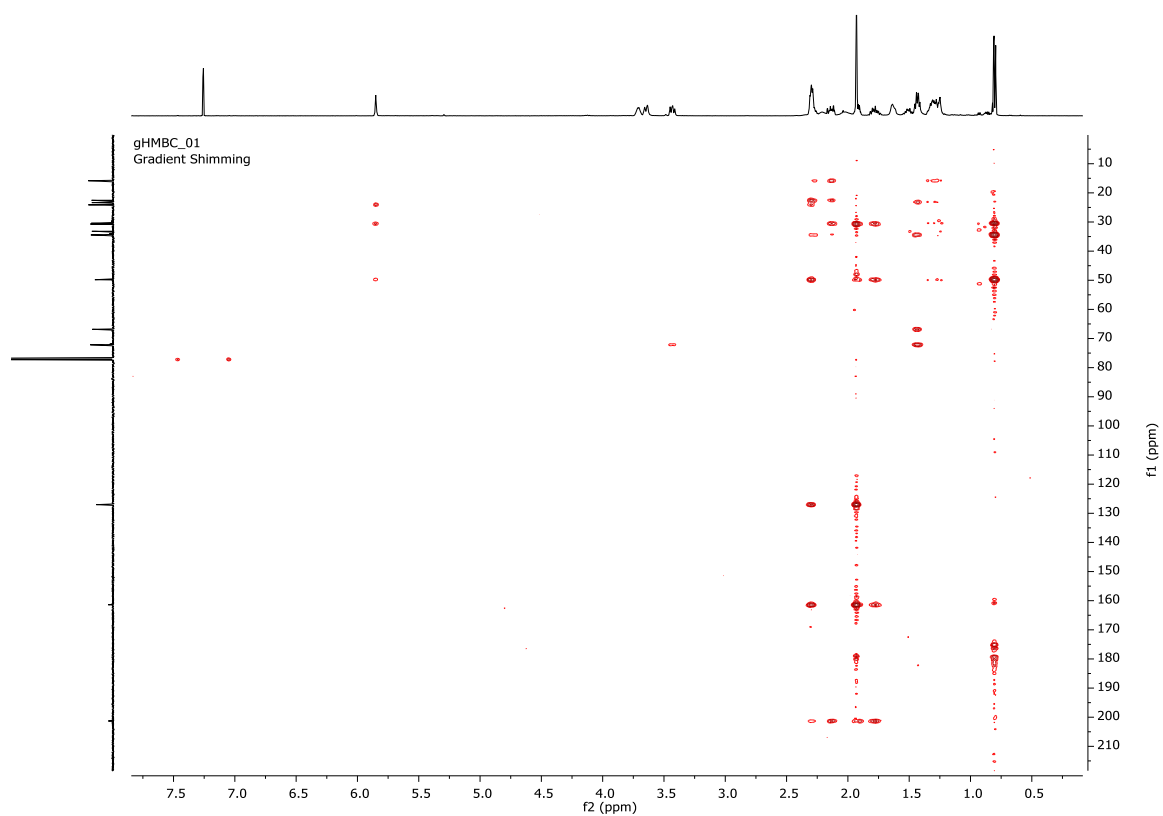

Figure SI-17: gHMBC spectrum of compound **11** in  $\text{CDCl}_3$ .

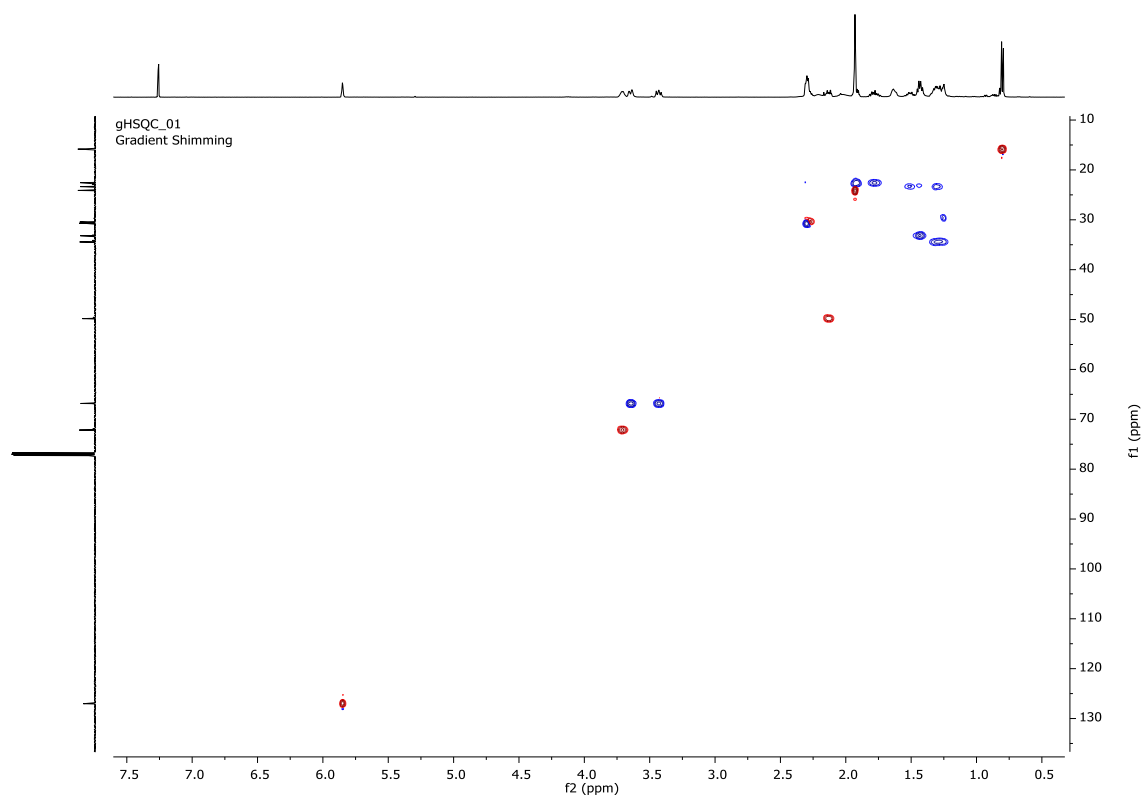

Figure SI-18: gHSQC spectrum of compound **11** in  $\text{CDCl}_3$ .

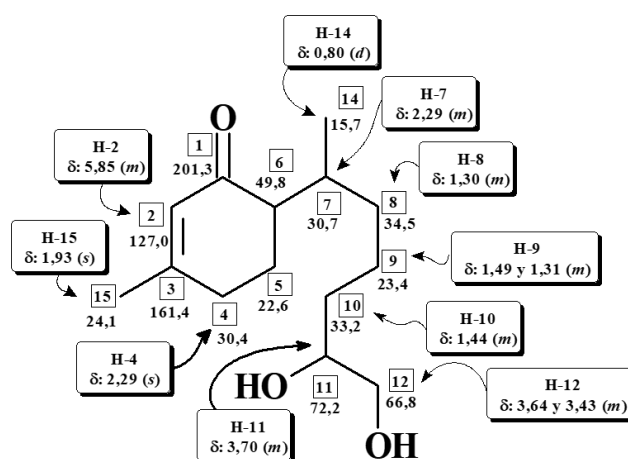

Figure SI-18a: gHSQC correlations of compound 11.



## 2- Antifungal activity against *Botrytis cinerea* UCA 992.

### Microplate bioassay. Compound 1, 2, 3, 4, 5, 6, 8, 10 and 11

#### SI- 19- Nevadensin (1).

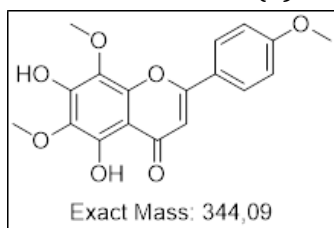

|                              |        |
|------------------------------|--------|
| <b>IC<sub>50</sub> (ppm)</b> | 57.03  |
| EC <sub>50</sub> Lower (ppm) | 27.51  |
| EC <sub>50</sub> Upper (ppm) | 118.2  |
| <b>IC<sub>50</sub> (μM)</b>  | 165.70 |
| EC <sub>50</sub> Lower (μM)  | 80,0   |
| EC <sub>50</sub> Upper (μM)  | 343,5  |

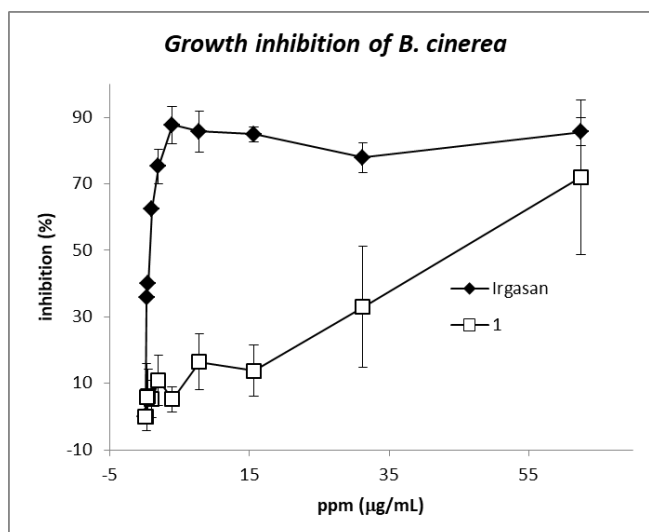

|                           |       |       |       |       |      |       |      |      |       |      |      |
|---------------------------|-------|-------|-------|-------|------|-------|------|------|-------|------|------|
| <b>Conc. (ppm)</b>        | 62,50 | 31,25 | 15,63 | 7,81  | 3,91 | 1,95  | 0,98 | 0,49 | 0,24  | 0,12 | 0,06 |
| <b>Inhibition (%)</b>     | 72,05 | 32,97 | 13,74 | 16,44 | 5,17 | 10,90 | 5,19 | 6,12 | 5,83  | 0,00 | 0,00 |
| <b>Standard deviation</b> | 23,30 | 18,21 | 7,72  | 8,46  | 3,68 | 7,65  | 5,63 | 8,06 | 10,10 | 0,00 | 0,00 |

Log EC<sub>50</sub>= 1.756

EC<sub>50</sub> = 57.03 ppm

EC<sub>50</sub> lower 95% confidence limit = 27.51 ppm

EC<sub>50</sub> upper 95% confidence limit = 118.2 ppm

#### **Transform of Prune rows of Data 1**

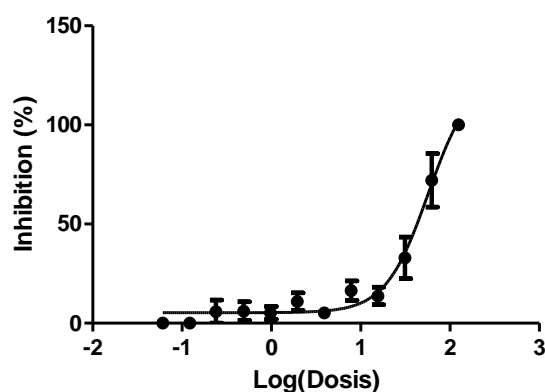

Error estandar LogEC<sub>50</sub>=0.1551

(debe ser <0.5; EC<sub>50</sub> valido)

R<sup>2</sup>=0.8659

**SI- 20- 4',7-Dimethoxyapigenin (2).**

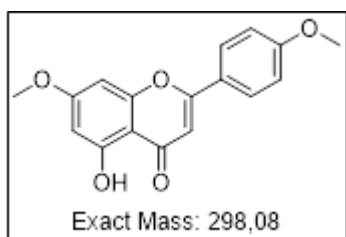

|                  |       |
|------------------|-------|
| IC50 (ppm)       | 31.25 |
| EC50 Lower (ppm) |       |
| EC50 Upper (ppm) |       |
| IC50 (μM)        | 104   |
| EC50 Lower (μM)  |       |
| EC50 Upper (μM)  |       |

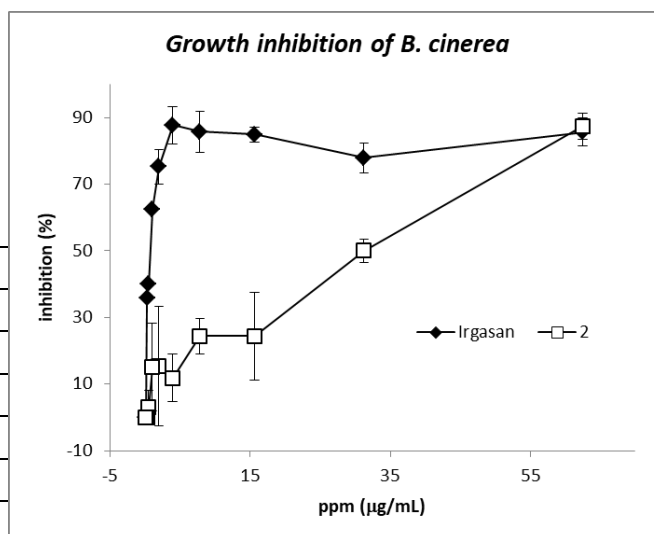

|                           |       |       |       |       |       |       |       |      |      |      |      |
|---------------------------|-------|-------|-------|-------|-------|-------|-------|------|------|------|------|
| <b>Conc. (ppm)</b>        | 62,50 | 31,25 | 15,63 | 7,81  | 3,91  | 1,95  | 0,98  | 0,49 | 0,24 | 0,12 | 0,06 |
| <b>Inhibition (%)</b>     | 87,42 | 49,98 | 24,35 | 24,34 | 11,85 | 15,38 | 15,10 | 2,94 | 0,00 | 0,00 | 0,00 |
| <b>Standard deviation</b> | 3,89  | 3,62  | 13,24 | 5,24  | 7,17  | 17,99 | 13,27 | 5,09 | 0,00 | 0,00 | 0,00 |

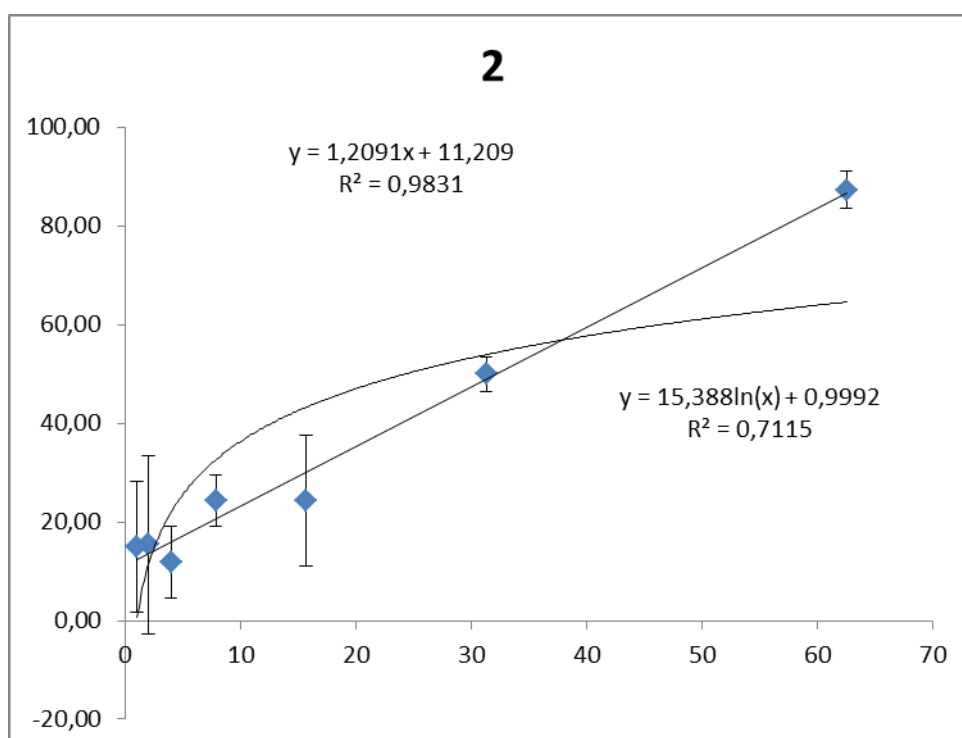

**SI-21- Genkwanin (3).**

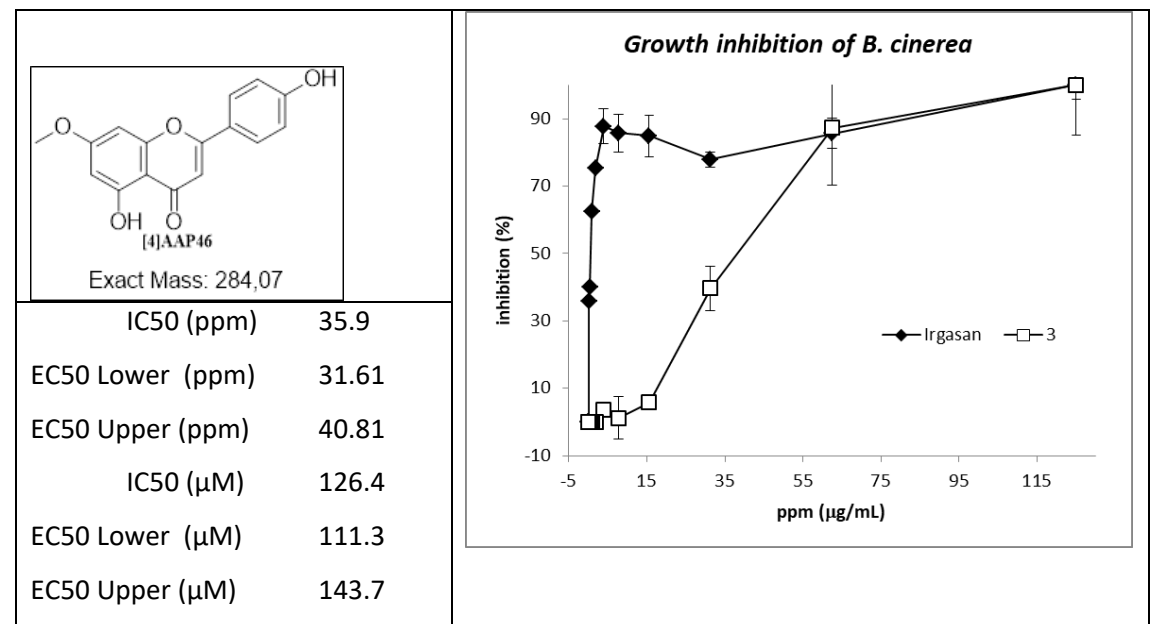

|                    |       |       |           |      |      |      |      |      |      |      |      |
|--------------------|-------|-------|-----------|------|------|------|------|------|------|------|------|
| Conc. (ppm)        | 62,50 | 31,25 | 15,6<br>3 | 7,81 | 3,91 | 1,95 | 0,98 | 0,49 | 0,24 | 0,12 | 0,06 |
| Inhibition (%)     | 87,28 | 39,64 | 5,77      | 1,16 | 3,69 | 0,00 | 0,00 | 0,00 | 0,00 | 0,00 | 0,00 |
| Standard deviation | 14,74 | 17,09 | 6,53      | 2,02 | 6,39 | 0,00 | 0,00 | 0,00 | 0,00 | 0,00 | 0,00 |

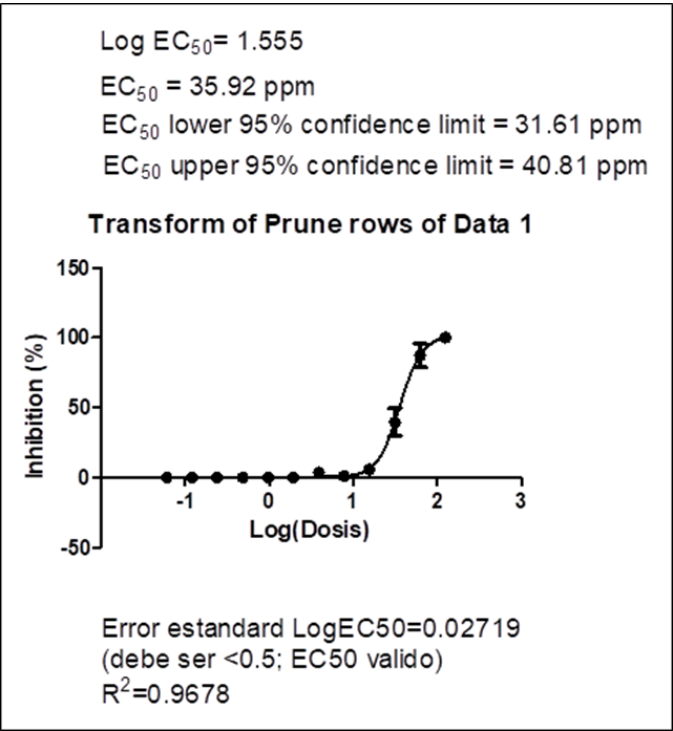

**SI- 22- Cirsimaritin (4).**

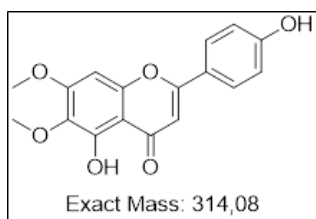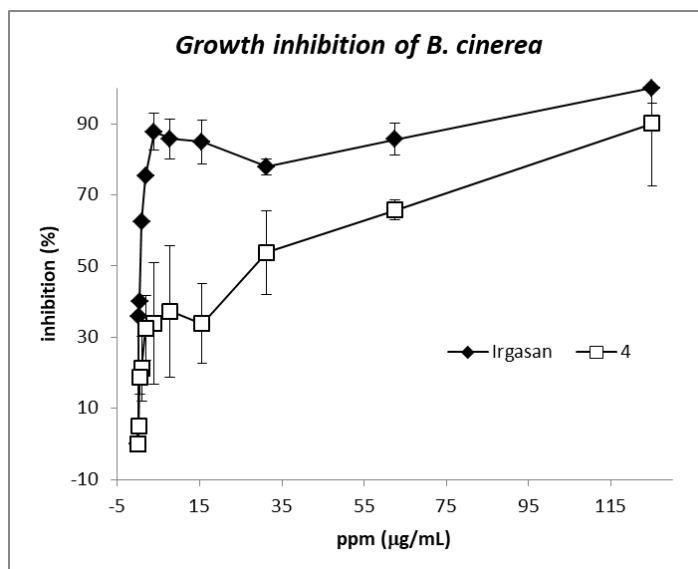

|                   |       |
|-------------------|-------|
| <b>IC50 (ppm)</b> | 38.9  |
| EC50 Lower (ppm)  |       |
| EC50 Upper (ppm)  |       |
| <b>IC50 (μM)</b>  | 123.9 |
| EC50 Lower (μM)   |       |
| EC50 Upper (μM)   |       |

|                           |       |       |       |       |       |       |       |       |      |      |      |
|---------------------------|-------|-------|-------|-------|-------|-------|-------|-------|------|------|------|
| <b>Conc. (ppm)</b>        | 62,50 | 31,25 | 15,63 | 7,81  | 3,91  | 1,95  | 0,98  | 0,49  | 0,24 | 0,12 | 0,06 |
| <b>Inhibition (%)</b>     | 65,68 | 53,76 | 33,84 | 37,32 | 33,86 | 32,60 | 21,21 | 18,73 | 4,95 | 0,00 | 0,00 |
| <b>Standard deviation</b> | 17,50 | 2,80  | 11,70 | 11,14 | 18,47 | 17,02 | 9,13  | 9,09  | 4,73 | 0,00 | 0,00 |

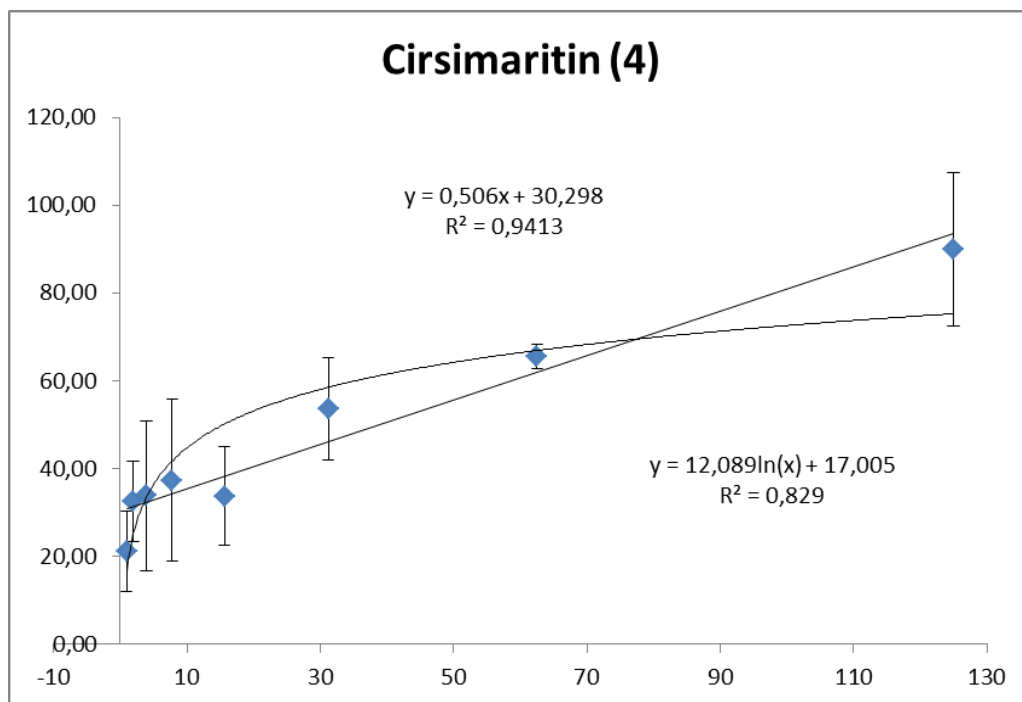

#### SI- 23- Salvigenin (5).

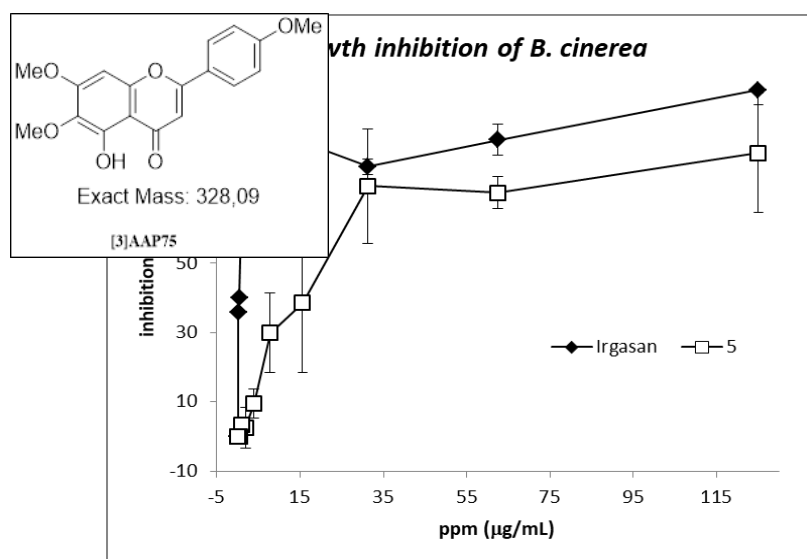

|                  |       |
|------------------|-------|
| IC50 (ppm)       | 13.49 |
| EC50 Lower (ppm) | 8.69  |
| EC50 Upper (ppm) | 20.94 |
| IC50 (μM)        | 41.1  |
| EC50 Lower (μM)  | 26.5  |
| EC50 Upper (μM)  | 63.8  |

|                           |       |       |       |       |       |      |      |      |      |      |      |
|---------------------------|-------|-------|-------|-------|-------|------|------|------|------|------|------|
| <b>Conc. (ppm)</b>        | 62,50 | 31,25 | 15,63 | 7,81  | 3,91  | 1,95 | 0,98 | 0,49 | 0,24 | 0,12 | 0,06 |
| <b>Inhibition (%)</b>     | 70,31 | 72,27 | 38,61 | 29,94 | 9,56  | 2,42 | 3,36 | 0,00 | 0,00 | 0,00 | 0,00 |
| <b>Standard deviation</b> | 17,35 | 4,60  | 16,65 | 20,08 | 11,41 | 4,19 | 5,81 | 0,00 | 0,00 | 0,00 | 0,00 |

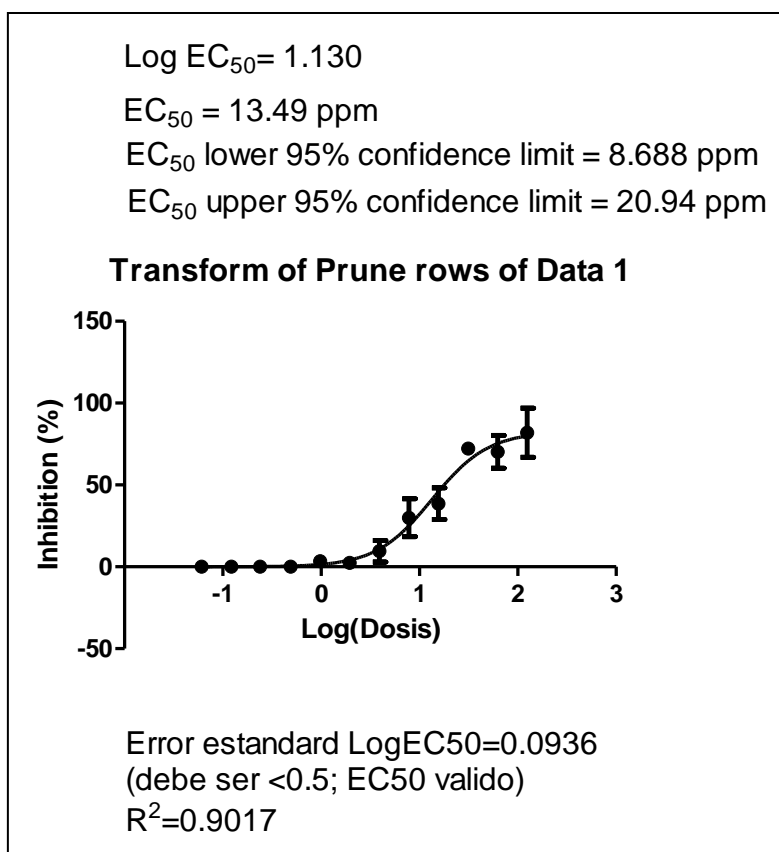

**SI- 24- Galangustin (6).**

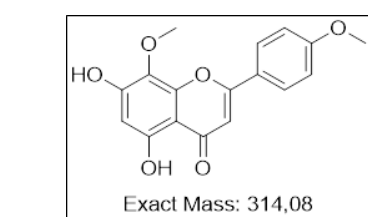

|                              |       |
|------------------------------|-------|
| <b>IC<sub>50</sub> (ppm)</b> | 14.06 |
| EC <sub>50</sub> Lower (ppm) | 9.41  |
| EC <sub>50</sub> Upper (ppm) | 21.01 |
| <b>IC<sub>50</sub> (μM)</b>  | 44.8  |
| EC <sub>50</sub> Lower (μM)  | 30.0  |
| EC <sub>50</sub> Upper (μM)  | 66.9  |

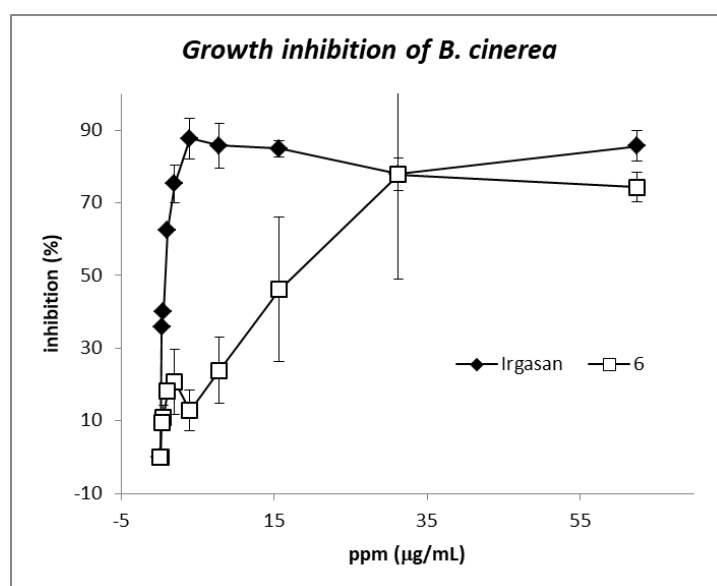

|                    |       |       |       |      |      |      |      |      |      |      |      |
|--------------------|-------|-------|-------|------|------|------|------|------|------|------|------|
| <b>Conc. (ppm)</b> | 62,50 | 31,25 | 15,63 | 7,81 | 3,91 | 1,95 | 0,98 | 0,49 | 0,24 | 0,12 | 0,06 |
|--------------------|-------|-------|-------|------|------|------|------|------|------|------|------|

|                    |       |       |       |       |       |       |       |       |      |      |      |
|--------------------|-------|-------|-------|-------|-------|-------|-------|-------|------|------|------|
| Inhibition (%)     | 74,32 | 77,75 | 46,17 | 23,89 | 12,78 | 20,79 | 18,14 | 10,97 | 9,54 | 0,00 | 0,00 |
| Standard deviation | 16,89 | 4,08  | 28,83 | 19,90 | 9,10  | 5,67  | 8,96  | 1,47  | 3,23 | 0,00 | 0,00 |

Log EC<sub>50</sub> = 1.148

EC<sub>50</sub> = 14.06 ppm

EC<sub>50</sub> lower 95% confidence limit = 9.408 ppm

EC<sub>50</sub> upper 95% confidence limit = 21.01 ppm

### Transform of Prune rows of Data 1

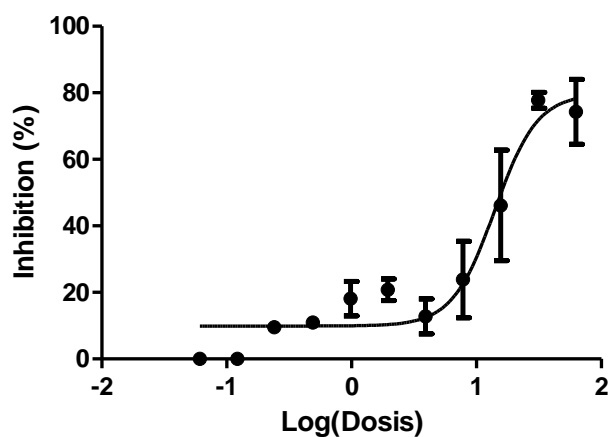

Error estandard LogEC<sub>50</sub>=0.08533

(debe ser <0.5; EC<sub>50</sub> valido)

R<sup>2</sup>=0.8164

### SI- 25- 3β,15-Dihydroxylabdan-7-en-17-al (8).

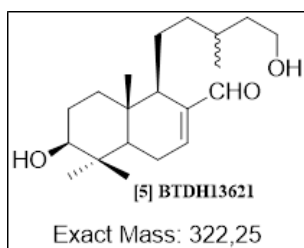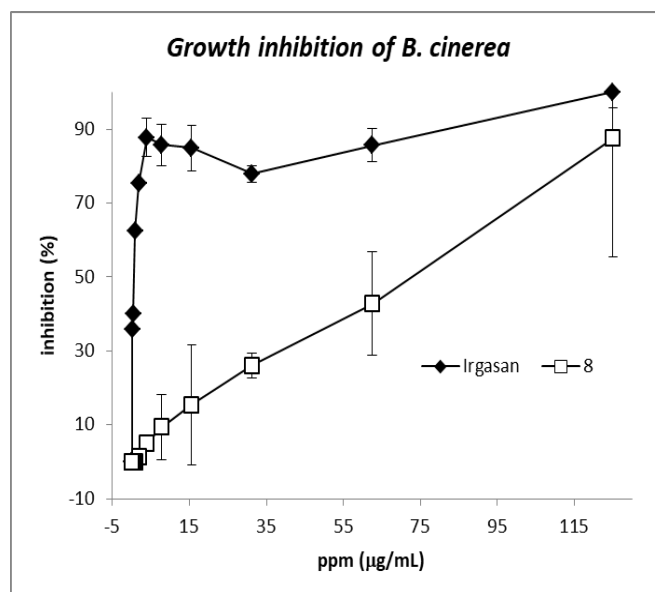

|                        |       |
|------------------------|-------|
| IC <sub>50</sub> (ppm) | 70.04 |
|------------------------|-------|

|                    |        |       |       |       |       |      |      |      |      |      |      |
|--------------------|--------|-------|-------|-------|-------|------|------|------|------|------|------|
| EC50 Lower (ppm)   |        |       |       |       |       |      |      |      |      |      |      |
| EC50 Upper (ppm)   |        |       |       |       |       |      |      |      |      |      |      |
| IC50 (μM)          | 246.6  |       |       |       |       |      |      |      |      |      |      |
| EC50 Lower (μM)    |        |       |       |       |       |      |      |      |      |      |      |
| EC50 Upper (μM)    |        |       |       |       |       |      |      |      |      |      |      |
| Conc. (ppm)        | 125,00 | 62,50 | 31,25 | 15,63 | 7,81  | 3,91 | 1,95 | 0,98 | 0,49 | 0,24 | 0,12 |
| Inhibition (%)     | 87,54  | 42,80 | 26,03 | 15,38 | 9,37  | 5,07 | 1,30 | 0,00 | 0,00 | 0,00 | 0,00 |
| Standard deviation | 5,50   | 32,02 | 14,00 | 3,41  | 16,23 | 8,78 | 2,25 | 0,00 | 0,00 | 0,00 | 0,00 |

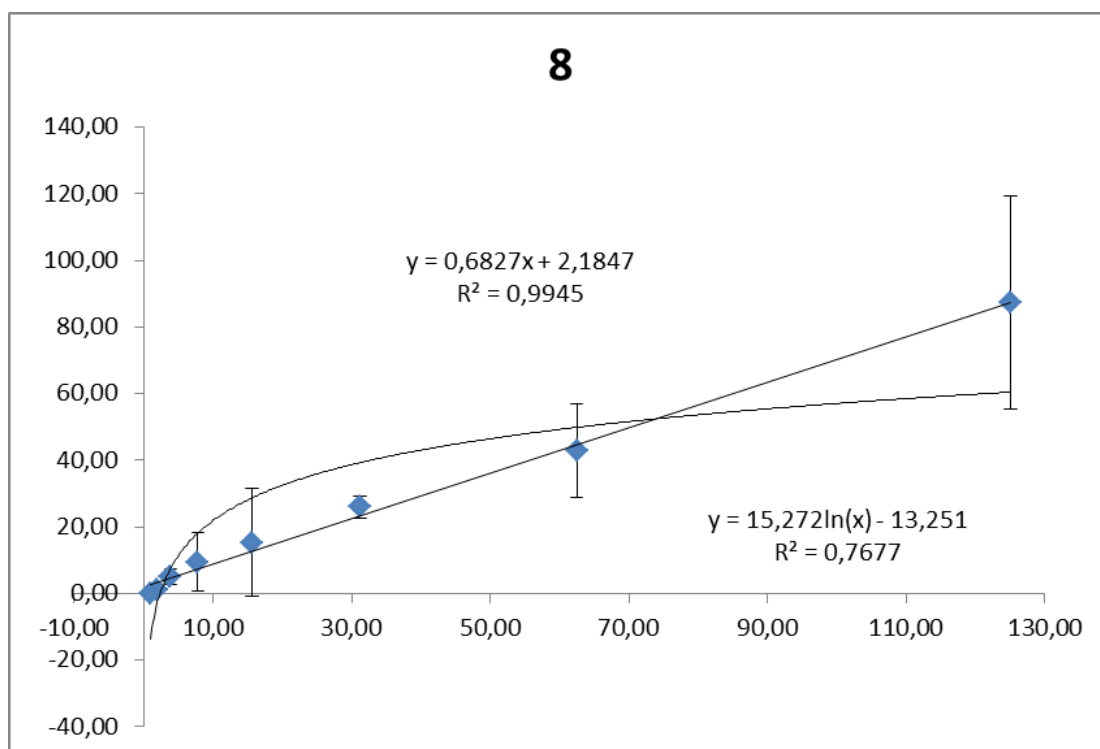



**SI- 26- 1,2-Dyhidrosenedigital-2-ona (10).**

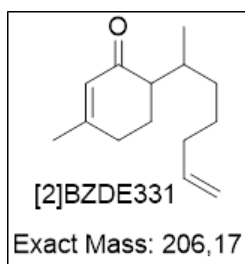

|                              |      |
|------------------------------|------|
| <b>IC<sub>50</sub> (ppm)</b> | 3.12 |
| EC <sub>50</sub> Lower (ppm) | 1.36 |
| EC <sub>50</sub> Upper (ppm) | 7.15 |
| <b>IC<sub>50</sub> (μM)</b>  | 15.2 |
| EC <sub>50</sub> Lower (μM)  | 6.6  |
| EC <sub>50</sub> Upper (μM)  | 34.7 |

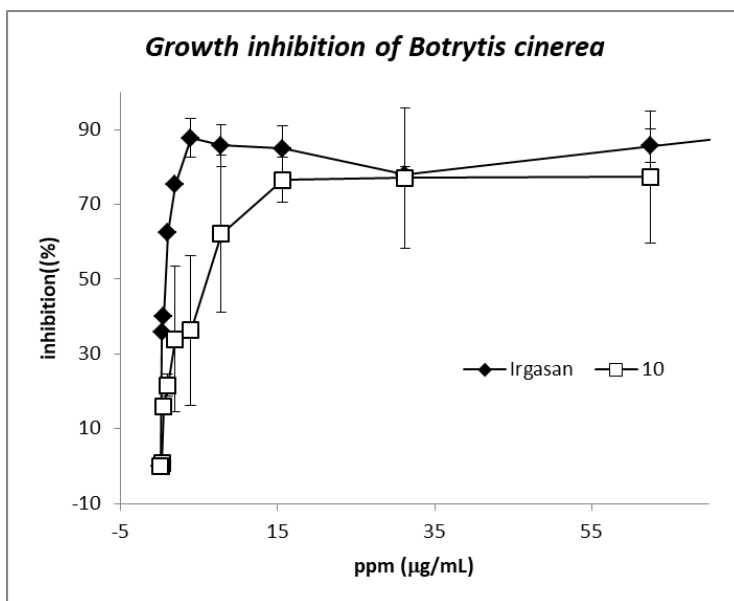

|                           |       |       |       |       |       |       |       |       |      |      |      |
|---------------------------|-------|-------|-------|-------|-------|-------|-------|-------|------|------|------|
| <b>Conc. (ppm)</b>        | 62,50 | 31,25 | 15,63 | 7,81  | 3,91  | 1,95  | 0,98  | 0,49  | 0,24 | 0,12 | 0,06 |
| <b>Inhibition (%)</b>     | 77,31 | 77,05 | 76,58 | 62,14 | 36,31 | 33,94 | 21,62 | 15,94 | 0,66 | 0,00 | 0,00 |
| <b>Standard deviation</b> | 20,87 | 17,58 | 18,83 | 5,93  | 21,12 | 20,07 | 19,54 | 2,86  | 1,14 | 0,00 | 0,00 |

Log EC<sub>50</sub>= 0.4949

EC<sub>50</sub> = 3.126 ppm

EC<sub>50</sub> lower 95% confidence limit = 1.365 ppm

EC<sub>50</sub> upper 95% confidence limit = 7.156 ppm

**Transform of Prune rows of Data 1**

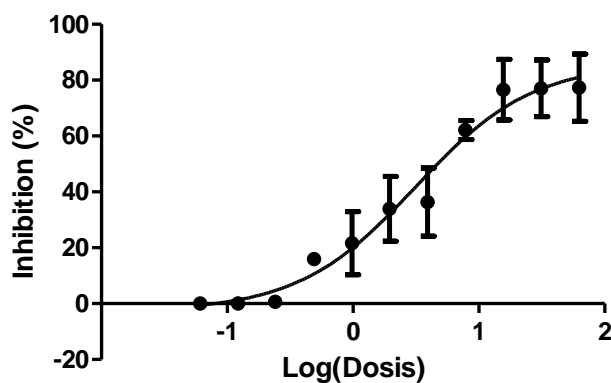

Error estandard LogEC<sub>50</sub>=0.1759

(debe ser <0.5; EC<sub>50</sub> valido)

R<sup>2</sup>=0.8468

**SI- 27- 13-nor-11,12-Dihydroxybisabol-2-enone (11).**

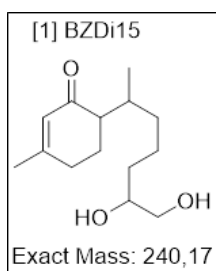

|                   |       |
|-------------------|-------|
| <b>IC50 (ppm)</b> | 59.07 |
| EC50 Lower (ppm)  | 53.79 |
| EC50 Upper (ppm)  | 64.87 |
| <b>IC50 (μM)</b>  | 246.0 |
| EC50 Lower (μM)   | 224.0 |
| EC50 Upper (μM)   | 270.1 |

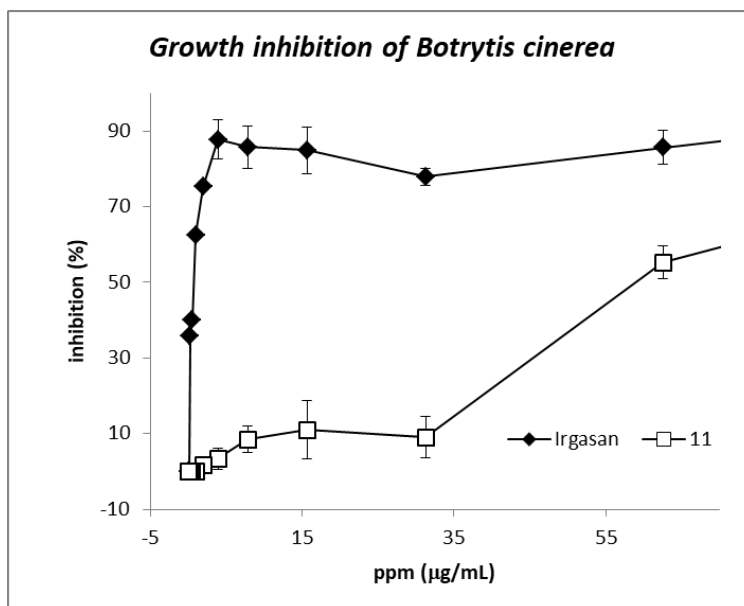

|                           |        |       |       |       |      |      |      |      |      |      |      |
|---------------------------|--------|-------|-------|-------|------|------|------|------|------|------|------|
| <b>Conc. (ppm)</b>        | 125,00 | 62,50 | 31,25 | 15,63 | 7,81 | 3,91 | 1,95 | 0,98 | 0,49 | 0,24 | 0,12 |
| <b>Inhibition (%)</b>     | 88,51  | 55,26 | 9,04  | 10,94 | 8,45 | 3,34 | 1,62 | 0,00 | 0,00 | 0,00 | 0,00 |
| <b>Standard deviation</b> | 5,04   | 11,33 | 4,32  | 5,57  | 7,76 | 3,57 | 2,81 | 0,00 | 0,00 | 0,00 | 0,00 |

Log EC<sub>50</sub>= 1.771

EC<sub>50</sub> = 59.07 ppm

EC<sub>50</sub> lower 95% confidence limit = 53.79 ppm

EC<sub>50</sub> upper 95% confidence limit = 64.87 ppm

**Transform of Prune rows of Data 1**

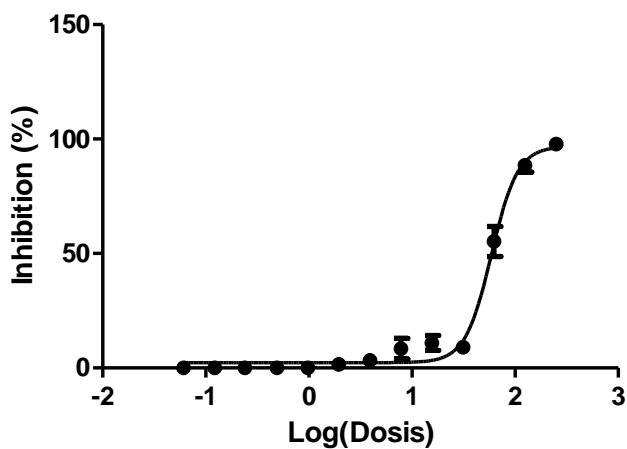

Error estandard LogEC<sub>50</sub>=0.02001  
(debe ser <0.5; EC<sub>50</sub> valido)

R<sup>2</sup>=0.9748

**SI- 28- Plate bioassay. Compound 5**

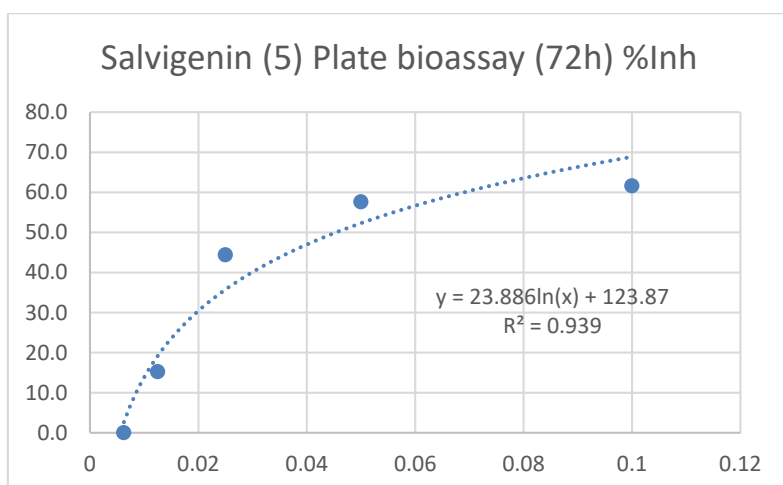

| Salvigenin (5) (72h) |      |
|----------------------|------|
| Conc                 | %Inh |
| 0,1                  | 61,6 |
| 0,05                 | 57,6 |
| 0,025                | 44,4 |
| 0,0125               | 15,2 |
| 0,00625              | 0,0  |
| <b>IC50 (ppm)</b>    |      |
| 14.89                |      |
| <b>IC50 (µM)</b>     |      |
| 45.4                 |      |

**SI- 29- Plate bioassay. Compound 10**

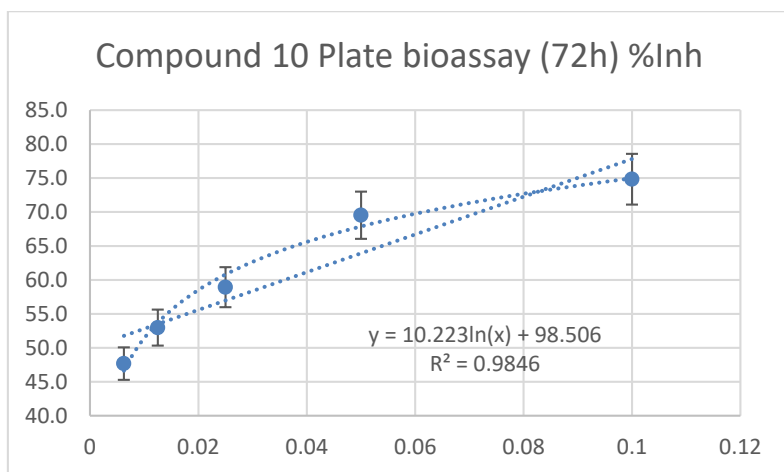

| Compound 10 (72h) |      |
|-------------------|------|
| Conc              | %Inh |
| 0,1               | 74,8 |
| 0,05              | 69,5 |
| 0,025             | 58,9 |
| 0,0125            | 53,0 |
| 0,00625           | 47,7 |
| <b>IC50 (ppm)</b> |      |
| 1.79              |      |
| <b>IC50 (µM)</b>  |      |
| 8.7               |      |

**SI- 30- Positive control. Microplate Bioassay (irgasan).**

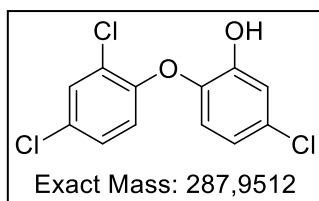

|                   |      |
|-------------------|------|
| <b>IC50 (ppm)</b> | 0.23 |
| EC50 Lower (ppm)  | 0.19 |
| EC50 Upper (ppm)  | 0.29 |
| <b>IC50 (μM)</b>  | 0.80 |
| EC50 Lower (μM)   | 0.65 |
| EC50 Upper (μM)   | 1.00 |

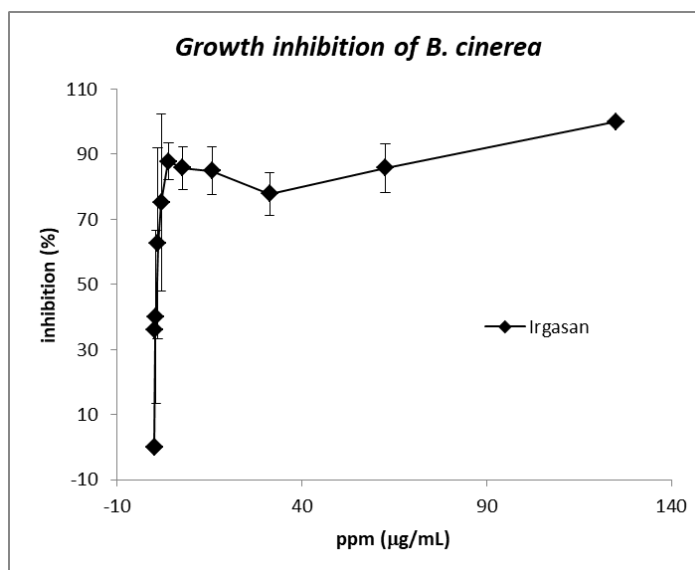

|                           |       |       |       |       |       |       |       |       |       |      |      |
|---------------------------|-------|-------|-------|-------|-------|-------|-------|-------|-------|------|------|
| <b>Conc. (ppm)</b>        | 62,50 | 31,25 | 15,63 | 7,81  | 3,91  | 1,95  | 0,98  | 0,49  | 0,24  | 0,12 | 0,06 |
| <b>Inhibition (%)</b>     | 85,69 | 77,88 | 84,89 | 85,73 | 87,74 | 75,27 | 62,52 | 39,93 | 35,89 | 0,00 | 0,00 |
| <b>Standard deviation</b> | 7,55  | 6,58  | 7,45  | 6,51  | 5,62  | 27,20 | 29,32 | 26,66 | 16,40 | 0,00 | 0,00 |

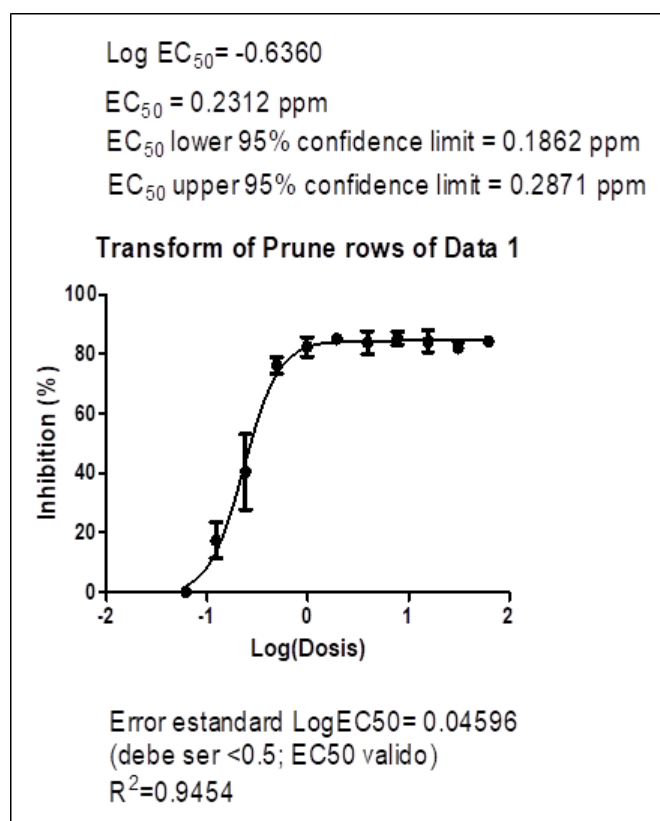

**SI- 31- Positive control. Plate Bioassay (irgasan).**

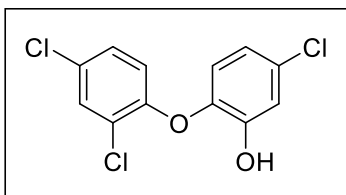

|                           |             |
|---------------------------|-------------|
| <b>IC50 (ppm)</b>         | <b>0.63</b> |
| Rango EC50 inferior (ppm) | -           |
| Rango EC50 superior (ppm) | -           |
| <b>IC50 (μM)</b>          | <b>2.19</b> |
| Rango EC50 inferior (μM)  | -           |
| Rango EC50 superior (μM)  | -           |

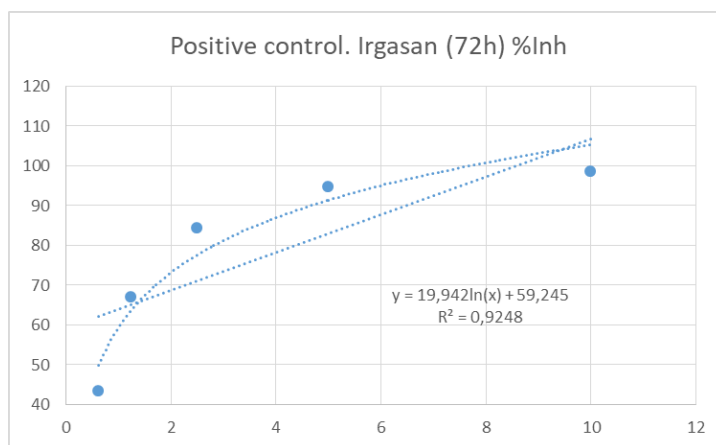

| <b>Irgasan (72h)</b> |             |
|----------------------|-------------|
| <b>Conc</b>          | <b>%Inh</b> |
| 10                   | 98,53       |
| 5                    | 94,57       |
| 2,5                  | 84,32       |
| 1,25                 | 66,94       |
| 0,625                | 43,23       |
